# Supplementary material
Source: Royal Society of Chemistry journal article supplement (doi:10.1039/d6cp00559d)
Supplement: d6cp00559d1.pdf [file d6cp00559d1.pdf]

## Supplementary information for

### Kinetics of the Tetrahydrofurfuryl Alcohol + •OH Reaction from *Ab Initio* RRKM-Master Equation Calculations

Huy K. Nguyen<sup>1,2</sup>, Loc T. Nguyen<sup>1,2</sup>, Tam V.-T. Mai<sup>1,2,\*</sup>, Quan Phung<sup>1,2</sup>, and Lam K. Huynh<sup>2,3,\*</sup>

<sup>1</sup> Faculty of Chemistry, University of Science, 227 Nguyen Van Cu, Cho Quan Ward, Ho Chi Minh City.

<sup>2</sup> Vietnam National University Ho Chi Minh City, Ho Chi Minh City, Vietnam

<sup>3</sup> International University, Ho Chi Minh City, Vietnam.

## Contents

|                                                                                                                                                                                                                                                                                                                                 |    |
|---------------------------------------------------------------------------------------------------------------------------------------------------------------------------------------------------------------------------------------------------------------------------------------------------------------------------------|----|
| <b>Table S1:</b> Optimized geometries, electronic energies at 0 K ( $E_{elec}^{0K}$ ), zero-point energy (ZPE) corrections and harmonic wavenumbers of the species involved with the lowest-energy conformer of a given species, calculated at CCSD(T)/cc-pVTZ//M06-2X/aug-cc-pVTZ level of theory for the title reaction. .... | 1  |
| <b>Table S2:</b> T1 diagnostics for the species involved in THFA + •OH reaction calculated at CCSD(T)/cc-pVTZ based on the M06-2X/aug-cc-pVTZ geometries.....                                                                                                                                                                   | 11 |
| <b>Table S3:</b> Calculated global rate constants, $k_{tot}$ , of the THFA + •OH → products over the range of temperature 200 – 2000 K at different pressures, including the HIR treatments and Eckart quantum tunneling effects. Units are in cm <sup>3</sup> /molecule/s. ....                                                | 12 |
| <b>Table S4:</b> The calculated Eckart tunneling factor via tight transition state channels over the wide range of temperature 200 – 2000 K. ....                                                                                                                                                                               | 13 |
| <b>Table S5:</b> Calculated overall rate constants, $k_{tot}$ , of the THFA + •OH → products over the range of temperature 200 – 2000 K at $P = 760$ Torr with and without HIR treatments based on M06-2X/aug-cc-pVTZ level of theory. Units are in cm <sup>3</sup> /molecule/s.....                                            | 14 |
| <b>Table S6:</b> Calculated NASA coefficients for the thermodynamic properties of various species in the reaction of •OH radicals with THFA. ....                                                                                                                                                                               | 15 |
| <b>Figure S1:</b> M06-2X/aug-cc-pVTZ optimized geometries for the species involved in the title reaction. All structures were obtained for the lowest-energy conformer of a given species. Bond lengths and bond angles are in Å and degree (°), respectively. ....                                                             | 20 |
| <b>Figure S2:</b> Hindrance potentials for the species involved in the THFA + •OH reaction, calculated at M06-2X/cc-pVDZ level of theory. ....                                                                                                                                                                                  | 26 |
| <b>Figure S3:</b> Calculated total rate constants for the reaction between THFA and •OH radicals with and without adjustment of the Lennard-Jones (L-J) parameters at 760 Torr. ....                                                                                                                                            | 27 |
| <b>Figure S4:</b> Structures of the two enantiomers of THFA: the ( <i>R</i> ) conformer (a) and the ( <i>S</i> ) conformer (b). ....                                                                                                                                                                                            | 27 |
| <b>Figure S5:</b> Predicted total rate constant ( $k_{tot}$ ) for the reaction of THFA with •OH radicals at 760 Torr, calculated without barrier adjustment and with all barrier heights varied by ±1.0 kcal/mol. ....                                                                                                          | 28 |

**Table S1:** Optimized geometries, electronic energies at 0 K ( $E_{elec}^{0K}$ ), zero-point energy (ZPE) corrections and harmonic wavenumbers of the species involved with the lowest-energy conformer of a given species, calculated at CCSD(T)/cc-pVTZ//M06-2X/aug-cc-pVTZ level of theory for the title reaction.

| Species                                     | Cartesian coordinate<br>(Å) |           |           | $E_{elec}^{0K}$<br>(Hartree) | ZPE<br>(Hartree) | Unscaled vibrational frequencies (cm <sup>-1</sup> ) |           |           |           |
|---------------------------------------------|-----------------------------|-----------|-----------|------------------------------|------------------|------------------------------------------------------|-----------|-----------|-----------|
| <b>•OH</b><br>(C <sub>∞v</sub> )            | O                           | 0.000000  | 0.000000  | 0.107999                     | -75.637723       | 0.008530                                             | 3744.2044 |           |           |
|                                             | H                           | 0.000000  | 0.000000  | -0.863995                    |                  |                                                      |           |           |           |
| <b>H<sub>2</sub>O</b><br>(C <sub>2v</sub> ) | O                           | 0.000000  | 0.000000  | 0.116363                     | -76.332140       | 0.021565                                             | 1616.2259 | 3871.2897 | 3975.2726 |
|                                             | H                           | 0.000000  | 0.762747  | -0.465451                    |                  |                                                      |           |           |           |
|                                             | H                           | 0.000000  | -0.762747 | -0.465451                    |                  |                                                      |           |           |           |
| <b>THFA</b><br>(C <sub>1</sub> )            | C                           | 1.654782  | -0.754886 | 0.172286                     | -346.429827      | 0.151797                                             | 53.5218   | 136.5753  | 247.5977  |
|                                             | O                           | 0.338588  | -1.158494 | -0.165993                    |                  |                                                      | 269.8399  | 343.4932  | 437.6462  |
|                                             | C                           | -0.304827 | -0.074433 | -0.838988                    |                  |                                                      | 579.4882  | 633.6844  | 720.8015  |
|                                             | C                           | 0.477045  | 1.200722  | -0.456415                    |                  |                                                      | 796.6210  | 889.1323  | 901.6419  |
|                                             | C                           | 1.509348  | 0.707815  | 0.563990                     |                  |                                                      | 920.0369  | 949.9764  | 1015.0611 |
|                                             | H                           | 2.011147  | -1.402099 | 0.970859                     |                  |                                                      | 1029.9474 | 1069.9751 | 1110.7234 |
|                                             | H                           | 2.316923  | -0.864451 | -0.694810                    |                  |                                                      | 1140.1917 | 1163.1223 | 1204.6350 |
|                                             | H                           | -0.264628 | -0.248870 | -1.919011                    |                  |                                                      | 1215.3931 | 1237.6036 | 1280.2498 |
|                                             | H                           | 0.969518  | 1.618916  | -1.332832                    |                  |                                                      | 1320.9552 | 1326.0603 | 1349.9246 |
|                                             | H                           | -0.183725 | 1.957066  | -0.038925                    |                  |                                                      | 1363.6821 | 1395.4531 | 1406.0463 |
|                                             | H                           | 2.448509  | 1.255419  | 0.524835                     |                  |                                                      | 1428.6003 | 1486.7677 | 1503.0760 |
|                                             | H                           | 1.105853  | 0.777639  | 1.573844                     |                  |                                                      | 1506.4109 | 1528.2592 | 3017.3311 |
|                                             | C                           | -1.751590 | -0.073019 | -0.387375                    |                  |                                                      | 3033.8023 | 3049.1395 | 3088.6037 |
|                                             | H                           | -2.223598 | -1.014482 | -0.684900                    |                  |                                                      | 3094.1281 | 3116.6887 | 3130.5592 |
|                                             | H                           | -2.287859 | 0.746713  | -0.865195                    |                  |                                                      | 3139.2978 | 3151.1479 | 3848.3879 |
|                                             | O                           | -1.849433 | 0.121324  | 1.007025                     |                  |                                                      |           |           |           |
|                                             | H                           | -1.313932 | -0.565687 | 1.416883                     |                  |                                                      |           |           |           |
| <b>RC</b><br>(C <sub>1</sub> )              | C                           | -1.231122 | 1.353397  | -0.143149                    | -422.082937      | 0.163413                                             | 36.8458   | 70.7450   | 126.1324  |
|                                             | O                           | -0.166816 | 0.727672  | -0.859019                    |                  |                                                      | 185.1469  | 193.7063  | 258.4646  |
|                                             | C                           | -0.341218 | -0.701452 | -0.832579                    |                  |                                                      | 277.7269  | 360.5557  | 423.1626  |
|                                             | C                           | -1.469833 | -0.973109 | 0.176082                     |                  |                                                      | 480.2549  | 562.5939  | 629.4645  |
|                                             | C                           | -1.604358 | 0.349604  | 0.932937                     |                  |                                                      | 734.7533  | 765.1245  | 797.4920  |
|                                             | H                           | -0.862867 | 2.305111  | 0.237195                     |                  |                                                      | 877.1650  | 909.0859  | 916.6762  |
|                                             | H                           | -2.067746 | 1.541999  | -0.822606                    |                  |                                                      | 953.2735  | 1012.0454 | 1027.1374 |
|                                             | H                           | -0.616809 | -1.025913 | -1.839407                    |                  |                                                      | 1072.0458 | 1110.0600 | 1129.0664 |
|                                             | H                           | -2.395923 | -1.208404 | -0.346905                    |                  |                                                      | 1160.8356 | 1211.5617 | 1219.7504 |
|                                             | H                           | -1.219851 | -1.802354 | 0.833403                     |                  |                                                      | 1248.1514 | 1283.5161 | 1324.4035 |
|                                             | H                           | -2.600907 | 0.514421  | 1.336373                     |                  |                                                      | 1334.5059 | 1356.3144 | 1388.9344 |
|                                             | H                           | -0.878665 | 0.390859  | 1.744060                     |                  |                                                      | 1397.7641 | 1415.1853 | 1427.4717 |
|                                             | C                           | 0.978530  | -1.352060 | -0.457229                    |                  |                                                      | 1485.9271 | 1496.6312 | 1501.1076 |
|                                             | H                           | 1.761333  | -1.000806 | -1.137321                    |                  |                                                      | 1531.4115 | 3038.7745 | 3043.9083 |
|                                             | H                           | 0.880391  | -2.430558 | -0.593722                    |                  |                                                      | 3060.0604 | 3092.0413 | 3094.6820 |
|                                             | O                           | 1.330999  | -1.124834 | 0.887656                     |                  |                                                      | 3100.1683 | 3122.6097 | 3145.3581 |
|                                             | H                           | 1.810594  | -0.288813 | 0.936841                     |                  |                                                      | 3155.3369 | 3391.2937 | 3793.5030 |
|                                             | O                           | 2.187800  | 1.593042  | 0.211267                     |                  |                                                      |           |           |           |
|                                             | H                           | 1.382589  | 1.379138  | -0.323514                    |                  |                                                      |           |           |           |

|                                  |          |           |           |           |             |          |           |           |           |
|----------------------------------|----------|-----------|-----------|-----------|-------------|----------|-----------|-----------|-----------|
| <b>TS1a</b><br>(C <sub>1</sub> ) | C        | 0.147428  | -1.452848 | 0.132016  | -422.070763 | 0.160918 | -758.5280 | 88.4911   | 119.0181  |
|                                  | O        | -0.058953 | -0.564335 | 1.198452  |             |          | 135.0153  | 186.6125  | 202.0649  |
|                                  | C        | -0.898018 | 0.518093  | 0.777285  |             |          | 255.9375  | 363.8048  | 397.0902  |
|                                  | C        | -1.791753 | -0.089119 | -0.303618 |             |          | 546.7421  | 606.5362  | 665.3616  |
|                                  | C        | -0.911728 | -1.176050 | -0.939257 |             |          | 700.8495  | 776.5539  | 811.1950  |
|                                  | H        | 1.188437  | -1.270772 | -0.296916 |             |          | 843.4078  | 894.4904  | 906.3289  |
|                                  | H        | 0.163725  | -2.471217 | 0.520658  |             |          | 956.0754  | 978.3405  | 1019.6436 |
|                                  | H        | -1.460819 | 0.826860  | 1.659398  |             |          | 1054.7213 | 1080.7425 | 1103.1874 |
|                                  | H        | -2.674460 | -0.530654 | 0.155593  |             |          | 1150.9882 | 1192.1792 | 1220.1750 |
|                                  | H        | -2.110117 | 0.655644  | -1.029316 |             |          | 1242.5616 | 1250.6984 | 1305.4709 |
|                                  | H        | -1.474006 | -2.075697 | -1.179455 |             |          | 1320.9174 | 1343.5386 | 1370.3804 |
|                                  | H        | -0.446133 | -0.806651 | -1.848954 |             |          | 1388.3234 | 1412.4774 | 1438.7489 |
|                                  | C        | -0.076409 | 1.702213  | 0.291923  |             |          | 1450.9549 | 1486.6464 | 1496.5269 |
|                                  | H        | 0.650899  | 1.968727  | 1.066142  |             |          | 1509.6080 | 2040.2149 | 3035.0148 |
|                                  | H        | -0.747123 | 2.553157  | 0.156668  |             |          | 3086.7884 | 3093.4084 | 3097.8456 |
|                                  | O        | 0.554420  | 1.472353  | -0.947404 |             |          | 3100.1287 | 3109.7796 | 3144.4948 |
|                                  | H        | 1.344390  | 0.934022  | -0.800040 |             |          | 3160.9087 | 3740.3166 | 3752.5438 |
| O                                | 2.550955 | -0.459520 | -0.124057 |           |             |          |           |           |           |
| H                                | 2.376716 | -0.385134 | 0.830190  |           |             |          |           |           |           |
| <b>TS1b</b><br>(C <sub>1</sub> ) | C        | 1.124602  | 0.026876  | 1.034595  | -422.067727 | 0.159412 | -743.1273 | 38.6646   | 59.5087   |
|                                  | O        | -0.014220 | -0.672547 | 0.607207  |             |          | 96.4896   | 143.9906  | 191.8731  |
|                                  | C        | -0.558851 | -0.043866 | -0.569058 |             |          | 233.9283  | 269.4121  | 388.4866  |
|                                  | C        | 0.296224  | 1.200645  | -0.825969 |             |          | 426.9273  | 490.6288  | 593.1005  |
|                                  | C        | 0.965976  | 1.446312  | 0.528843  |             |          | 659.0514  | 711.2833  | 825.7289  |
|                                  | H        | 1.244468  | -0.099018 | 2.109181  |             |          | 853.5234  | 878.1466  | 949.6819  |
|                                  | H        | 2.048602  | -0.424238 | 0.534122  |             |          | 973.3562  | 1006.6375 | 1032.2490 |
|                                  | H        | -0.504626 | -0.765241 | -1.386504 |             |          | 1074.3977 | 1086.0227 | 1125.9941 |
|                                  | H        | 1.052013  | 0.991918  | -1.580157 |             |          | 1157.7725 | 1183.4396 | 1215.4840 |
|                                  | H        | -0.308624 | 2.042328  | -1.160384 |             |          | 1240.3610 | 1281.8715 | 1307.9587 |
|                                  | H        | 1.913817  | 1.972542  | 0.448523  |             |          | 1329.6619 | 1347.2184 | 1352.0217 |
|                                  | H        | 0.309999  | 2.005048  | 1.198452  |             |          | 1378.7445 | 1396.0599 | 1414.1216 |
|                                  | C        | -2.010751 | 0.276667  | -0.273787 |             |          | 1443.0825 | 1483.6866 | 1500.2890 |
|                                  | H        | -2.495065 | 0.649222  | -1.176717 |             |          | 1505.3791 | 1910.9040 | 3010.9476 |
|                                  | H        | -2.052299 | 1.065613  | 0.488433  |             |          | 3076.4978 | 3077.8597 | 3095.9807 |
|                                  | O        | -2.720954 | -0.865858 | 0.140088  |             |          | 3111.8968 | 3124.5180 | 3141.9641 |
|                                  | H        | -2.206342 | -1.282023 | 0.839226  |             |          | 3152.6050 | 3772.3982 | 3849.4692 |
| O                                | 2.736157 | -1.174071 | -0.632399 |           |             |          |           |           |           |
| H                                | 2.086995 | -1.896155 | -0.601079 |           |             |          |           |           |           |
| <b>TS2a</b><br>(C <sub>1</sub> ) | C        | -1.320627 | -1.017402 | -0.789945 | -422.068828 | 0.159224 | -848.4225 | 73.2434   | 111.6892  |
|                                  | O        | 0.083880  | -1.033663 | -0.980146 |             |          | 135.8978  | 160.0034  | 249.1438  |
|                                  | C        | 0.732423  | -1.010632 | 0.291393  |             |          | 260.2893  | 336.4594  | 401.4990  |
|                                  | C        | -0.314267 | -0.514084 | 1.310935  |             |          | 571.5952  | 604.3899  | 651.5308  |
|                                  | C        | -1.533070 | -0.189745 | 0.459001  |             |          | 716.5461  | 761.9078  | 828.6530  |
|                                  | H        | -1.780016 | -0.598369 | -1.682736 |             |          | 893.3587  | 909.6821  | 934.1408  |
|                                  | H        | -1.694797 | -2.038877 | -0.643652 |             |          | 948.7145  | 1021.8826 | 1031.2902 |
|                                  | H        | 1.070973  | -2.020260 | 0.543392  |             |          | 1057.8242 | 1079.7076 | 1112.5079 |
|                                  | H        | -0.545560 | -1.296681 | 2.033134  |             |          | 1143.4265 | 1164.7887 | 1201.0754 |
|                                  | H        | 0.040872  | 0.354696  | 1.863613  |             |          | 1229.5950 | 1248.4166 | 1268.6587 |
|                                  | H        | -2.495620 | -0.321163 | 0.947193  |             |          | 1316.9479 | 1323.6612 | 1342.3526 |
|                                  | H        | -1.499084 | 0.941456  | 0.157459  |             |          | 1372.5474 | 1392.8828 | 1407.8246 |
|                                  | C        | 1.940103  | -0.103607 | 0.143798  |             |          | 1429.5863 | 1449.8416 | 1492.0706 |
|                                  | H        | 2.652136  | -0.553274 | -0.553208 |             |          | 1508.4497 | 1515.6629 | 3009.2483 |
|                                  | H        | 2.433077  | 0.026733  | 1.106306  |             |          | 3040.5515 | 3060.7762 | 3085.4471 |

|                                  |   |           |           |           |             |          |            |           |           |
|----------------------------------|---|-----------|-----------|-----------|-------------|----------|------------|-----------|-----------|
|                                  | O | 1.551786  | 1.179721  | -0.309336 |             |          | 3126.1524  | 3129.6380 | 3131.2398 |
|                                  | H | 1.104595  | 1.042559  | -1.153332 |             |          | 3142.6287  | 3686.4902 | 3818.6446 |
|                                  | O | -1.149934 | 2.268324  | -0.109694 |             |          |            |           |           |
|                                  | H | -0.199807 | 2.160948  | 0.084145  |             |          |            |           |           |
| <b>TS2b</b><br>(C <sub>i</sub> ) | C | 0.766121  | -0.122479 | 1.365705  | -422.064675 | 0.158786 | -985.6943  | 49.3465   | 109.7587  |
|                                  | O | -0.078553 | -0.836885 | 0.473033  |             |          | 116.8124   | 152.6643  | 226.9412  |
|                                  | C | -0.552030 | 0.084136  | -0.526884 |             |          | 299.7770   | 374.1333  | 399.7624  |
|                                  | C | 0.413560  | 1.282493  | -0.511862 |             |          | 421.9042   | 494.9213  | 526.4895  |
|                                  | C | 1.496015  | 0.841733  | 0.460232  |             |          | 696.2344   | 805.4865  | 839.4505  |
|                                  | H | 0.174215  | 0.415566  | 2.116503  |             |          | 868.5444   | 904.3974  | 943.0375  |
|                                  | H | 1.410597  | -0.839042 | 1.870363  |             |          | 958.0051   | 1013.4723 | 1033.3068 |
|                                  | H | -0.534227 | -0.455047 | -1.474414 |             |          | 1061.9437  | 1095.3054 | 1116.8149 |
|                                  | H | 0.807688  | 1.506880  | -1.499705 |             |          | 1144.4872  | 1171.6843 | 1194.9893 |
|                                  | H | -0.093300 | 2.175766  | -0.137000 |             |          | 1218.7391  | 1245.8592 | 1273.8464 |
|                                  | H | 2.263183  | 0.186678  | -0.149085 |             |          | 1284.9950  | 1305.4505 | 1337.6586 |
|                                  | H | 2.069249  | 1.627992  | 0.944620  |             |          | 1356.7048  | 1377.8858 | 1403.0385 |
|                                  | C | -1.979636 | 0.467237  | -0.194617 |             |          | 1438.2410  | 1488.1168 | 1502.0304 |
|                                  | H | -2.368834 | 1.142522  | -0.957689 |             |          | 1519.1600  | 1626.8318 | 3005.5898 |
|                                  | H | -1.990129 | 1.000563  | 0.765309  |             |          | 3017.4923  | 3057.7158 | 3092.7606 |
|                                  | O | -2.823355 | -0.657986 | -0.157698 |             |          | 3108.4864  | 3134.4610 | 3143.2086 |
|                                  | H | -2.393725 | -1.317607 | 0.396554  |             |          | 3147.7189  | 3744.9303 | 3848.3629 |
|                                  | O | 2.643174  | -0.917858 | -0.905857 |             |          |            |           |           |
|                                  | H | 1.860983  | -1.461156 | -0.706723 |             |          |            |           |           |
| <b>TS3a</b><br>(C <sub>i</sub> ) | C | -2.099588 | -0.063643 | -0.390500 | -422.069292 | 0.159057 | -980.2265  | 40.6308   | 115.2854  |
|                                  | O | -1.113439 | -1.071477 | -0.227177 |             |          | 150.8344   | 216.2932  | 233.6432  |
|                                  | C | -0.215332 | -0.633712 | 0.788319  |             |          | 283.1717   | 327.1803  | 439.8808  |
|                                  | C | -0.256241 | 0.899564  | 0.752862  |             |          | 562.8784   | 587.0792  | 642.7023  |
|                                  | C | -1.327764 | 1.247784  | -0.276123 |             |          | 673.4973   | 769.9714  | 850.2207  |
|                                  | H | -2.581394 | -0.216409 | -1.353196 |             |          | 883.9151   | 910.7990  | 941.5551  |
|                                  | H | -2.850987 | -0.148300 | 0.402327  |             |          | 953.9998   | 1005.8955 | 1029.3380 |
|                                  | H | -0.565151 | -0.992936 | 1.763426  |             |          | 1048.1035  | 1085.4142 | 1116.1059 |
|                                  | H | -0.413254 | 1.339269  | 1.735321  |             |          | 1146.2674  | 1158.8717 | 1172.9709 |
|                                  | H | 0.779009  | 1.352236  | 0.412016  |             |          | 1217.7930  | 1231.4119 | 1266.0683 |
|                                  | H | -1.952262 | 2.086172  | 0.022470  |             |          | 1305.5441  | 1318.3305 | 1339.9772 |
|                                  | H | -0.861651 | 1.489446  | -1.231658 |             |          | 1354.5407  | 1387.8831 | 1401.1514 |
|                                  | C | 1.130087  | -1.271119 | 0.486934  |             |          | 1432.4144  | 1443.0372 | 1491.4835 |
|                                  | H | 1.056964  | -2.352445 | 0.626734  |             |          | 1506.6962  | 1526.3095 | 3022.0151 |
|                                  | H | 1.888700  | -0.877531 | 1.162147  |             |          | 3030.8858  | 3062.6485 | 3086.9409 |
|                                  | O | 1.546843  | -0.973667 | -0.832963 |             |          | 3126.1959  | 3130.8946 | 3140.2646 |
|                                  | H | 0.803295  | -1.181981 | -1.410071 |             |          | 3150.6287  | 3669.1590 | 3829.2409 |
|                                  | O | 1.969194  | 1.735649  | -0.146461 |             |          |            |           |           |
|                                  | H | 2.088972  | 0.905198  | -0.645664 |             |          |            |           |           |
| <b>TS3b</b><br>(C <sub>i</sub> ) | C | 2.317156  | -0.227492 | 0.034443  | -422.061016 | 0.157830 | -1149.2913 | 46.2074   | 86.9057   |
|                                  | O | 1.298621  | -1.137467 | -0.387801 |             |          | 139.5921   | 152.8027  | 204.2261  |
|                                  | C | 0.030627  | -0.494472 | -0.367093 |             |          | 225.4923   | 250.0997  | 411.4107  |
|                                  | C | 0.221505  | 0.740861  | 0.490972  |             |          | 435.2745   | 447.1764  | 523.5264  |
|                                  | C | 1.646904  | 1.144101  | 0.166866  |             |          | 626.9014   | 692.6233  | 846.2279  |
|                                  | H | 2.713539  | -0.566245 | 0.994266  |             |          | 877.0380   | 897.2369  | 958.0504  |
|                                  | H | 3.122360  | -0.236525 | -0.699143 |             |          | 993.6674   | 1000.6451 | 1019.3571 |
|                                  | H | -0.250187 | -0.192812 | -1.383222 |             |          | 1072.4875  | 1099.8679 | 1127.8599 |
|                                  | H | -0.570691 | 1.576778  | 0.173835  |             |          | 1155.7593  | 1165.7455 | 1208.6923 |
|                                  | H | 0.040556  | 0.552268  | 1.550056  |             |          | 1231.8550  | 1244.2351 | 1259.6207 |

|                                      |   |           |           |           |             |          |            |           |           |
|--------------------------------------|---|-----------|-----------|-----------|-------------|----------|------------|-----------|-----------|
|                                      | H | 1.676870  | 1.675804  | -0.784507 |             |          | 1284.2517  | 1302.8937 | 1332.0529 |
|                                      | H | 2.109773  | 1.766665  | 0.927838  |             |          | 1349.5673  | 1388.2969 | 1410.4776 |
|                                      | C | -1.002764 | -1.466300 | 0.155342  |             |          | 1467.1264  | 1479.3109 | 1496.1282 |
|                                      | H | -0.734438 | -1.763099 | 1.173578  |             |          | 1529.7604  | 1537.1187 | 3025.7780 |
|                                      | H | -1.024144 | -2.356094 | -0.477444 |             |          | 3044.0728  | 3056.9050 | 3084.8362 |
|                                      | O | -2.252278 | -0.787338 | 0.130186  |             |          | 3094.1506  | 3100.3262 | 3113.6322 |
|                                      | H | -2.949480 | -1.379654 | 0.416949  |             |          | 3154.7565  | 3723.6781 | 3903.7996 |
|                                      | O | -1.695957 | 2.106841  | -0.308457 |             |          |            |           |           |
|                                      | H | -2.217813 | 1.286436  | -0.246809 |             |          |            |           |           |
| <b>TS4</b><br><b>(C<sub>1</sub>)</b> | C | 1.711790  | 0.317096  | -1.044245 | -422.070848 | 0.159863 | -617.2888  | 36.4753   | 70.9142   |
|                                      | O | 0.439138  | -0.316488 | -1.022165 |             |          | 131.1892   | 147.2763  | 206.1447  |
|                                      | C | -0.082757 | -0.096696 | 0.261344  |             |          | 238.9201   | 348.7678  | 424.2435  |
|                                      | C | 1.096026  | -0.168883 | 1.234730  |             |          | 475.2552   | 499.9302  | 565.2659  |
|                                      | C | 2.328217  | -0.007813 | 0.318517  |             |          | 639.8761   | 740.9728  | 817.9039  |
|                                      | H | 2.268389  | -0.074979 | -1.891094 |             |          | 868.8990   | 902.3467  | 939.7855  |
|                                      | H | 1.573907  | 1.395442  | -1.169806 |             |          | 976.8506   | 1018.4972 | 1052.6931 |
|                                      | H | -0.524823 | 0.967006  | 0.292278  |             |          | 1080.8306  | 1101.3394 | 1135.8261 |
|                                      | H | 1.026488  | 0.611654  | 1.988584  |             |          | 1166.9190  | 1191.1470 | 1206.9129 |
|                                      | H | 1.105374  | -1.130925 | 1.748612  |             |          | 1233.2107  | 1265.1598 | 1288.5330 |
|                                      | H | 3.003841  | 0.773968  | 0.656617  |             |          | 1304.8632  | 1322.0535 | 1342.0039 |
|                                      | H | 2.887847  | -0.939225 | 0.264158  |             |          | 1368.2464  | 1395.2539 | 1428.7969 |
|                                      | C | -1.233965 | -1.040870 | 0.491138  |             |          | 1488.2259  | 1498.3672 | 1508.4213 |
|                                      | H | -1.663204 | -0.864650 | 1.476478  |             |          | 1527.9694  | 1818.5646 | 3036.3022 |
|                                      | H | -0.867316 | -2.072320 | 0.443729  |             |          | 3045.6952  | 3080.5715 | 3102.5718 |
|                                      | O | -2.263938 | -0.823880 | -0.454681 |             |          | 3129.1560  | 3134.4587 | 3147.1547 |
|                                      | H | -1.869847 | -0.898211 | -1.330356 |             |          | 3157.6151  | 3717.0080 | 3846.3330 |
|                                      | O | -1.622447 | 1.996756  | 0.234592  |             |          |            |           |           |
|                                      | H | -2.278553 | 1.364132  | -0.110080 |             |          |            |           |           |
| <b>TS5</b><br><b>(C<sub>1</sub>)</b> | C | -1.508713 | -1.258473 | -0.356654 | -422.069099 | 0.159714 | -837.6178  | 52.9383   | 63.6660   |
|                                      | O | -0.129192 | -1.012032 | -0.118222 |             |          | 125.2972   | 161.9325  | 243.4064  |
|                                      | C | -0.006173 | 0.095782  | 0.783410  |             |          | 263.1452   | 303.0954  | 376.2444  |
|                                      | C | -1.369198 | 0.818671  | 0.767774  |             |          | 469.5497   | 575.5658  | 629.7501  |
|                                      | C | -2.138013 | 0.125067  | -0.361618 |             |          | 730.3100   | 746.3600  | 801.4427  |
|                                      | H | -1.595058 | -1.797131 | -1.297621 |             |          | 891.3871   | 919.2556  | 925.7629  |
|                                      | H | -1.921879 | -1.876892 | 0.447450  |             |          | 949.7382   | 994.9255  | 1023.4158 |
|                                      | H | 0.236789  | -0.280840 | 1.780417  |             |          | 1058.6757  | 1105.1127 | 1132.0907 |
|                                      | H | -1.877206 | 0.679094  | 1.720516  |             |          | 1148.4371  | 1198.8543 | 1212.6238 |
|                                      | H | -1.250759 | 1.885684  | 0.593885  |             |          | 1220.4842  | 1275.3107 | 1286.0628 |
|                                      | H | -3.213086 | 0.104359  | -0.197840 |             |          | 1321.9465  | 1326.2960 | 1347.0325 |
|                                      | H | -1.939094 | 0.616600  | -1.313664 |             |          | 1359.6946  | 1393.3090 | 1398.2186 |
|                                      | C | 1.148060  | 0.936230  | 0.283436  |             |          | 1430.5018  | 1487.7856 | 1502.8774 |
|                                      | H | 2.079019  | 0.241218  | 0.279248  |             |          | 1530.2593  | 1722.9393 | 3033.3961 |
|                                      | H | 1.377224  | 1.760362  | 0.958176  |             |          | 3059.3879  | 3090.0022 | 3096.9533 |
|                                      | O | 0.934093  | 1.451407  | -0.991486 |             |          | 3121.2131  | 3136.0291 | 3142.5519 |
|                                      | H | 0.748497  | 0.706785  | -1.574362 |             |          | 3153.6887  | 3733.1009 | 3834.4714 |
|                                      | O | 2.774100  | -1.038564 | 0.108273  |             |          |            |           |           |
|                                      | H | 1.967765  | -1.549388 | -0.082803 |             |          |            |           |           |
| <b>TS6</b><br><b>(C<sub>1</sub>)</b> | C | -1.492947 | 1.081305  | -0.291329 | -422.065863 | 0.158038 | -1729.0808 | 67.0504   | 85.4403   |
|                                      | O | -0.439433 | 0.510861  | -1.068554 |             |          | 183.8448   | 212.7424  | 266.8479  |
|                                      | C | -0.282288 | -0.872485 | -0.724580 |             |          | 274.7628   | 370.2750  | 456.6312  |
|                                      | C | -1.195105 | -1.123763 | 0.485727  |             |          | 543.9403   | 560.4494  | 631.5829  |
|                                      | C | -1.490603 | 0.285455  | 1.001470  |             |          | 747.2541   | 796.1337  | 851.9859  |

|                                  |   |           |           |           |             |          |           |           |           |
|----------------------------------|---|-----------|-----------|-----------|-------------|----------|-----------|-----------|-----------|
|                                  | H | -1.276249 | 2.140288  | -0.161186 |             |          | 873.9865  | 905.6638  | 925.8828  |
|                                  | H | -2.441279 | 0.974735  | -0.826934 |             |          | 951.6192  | 956.0685  | 1010.9573 |
|                                  | H | -0.578093 | -1.475645 | -1.586905 |             |          | 1033.0298 | 1075.6957 | 1120.9061 |
|                                  | H | -2.114400 | -1.614635 | 0.168283  |             |          | 1128.8401 | 1153.7135 | 1209.3966 |
|                                  | H | -0.707380 | -1.748164 | 1.230792  |             |          | 1218.5651 | 1277.3604 | 1283.2529 |
|                                  | H | -2.431416 | 0.355815  | 1.542636  |             |          | 1323.1017 | 1331.2495 | 1356.8191 |
|                                  | H | -0.679082 | 0.629472  | 1.641324  |             |          | 1375.0440 | 1399.4148 | 1404.7056 |
|                                  | C | 1.188399  | -1.143866 | -0.439512 |             |          | 1456.4483 | 1488.1271 | 1501.9357 |
|                                  | H | 1.803348  | -0.815194 | -1.282965 |             |          | 1531.1273 | 1560.7132 | 3029.1226 |
|                                  | H | 1.322310  | -2.225335 | -0.325357 |             |          | 3042.4248 | 3057.6937 | 3075.4156 |
|                                  | O | 1.632191  | -0.577908 | 0.760231  |             |          | 3091.1620 | 3096.5574 | 3126.1870 |
|                                  | H | 1.948947  | 0.466717  | 0.589863  |             |          | 3143.9590 | 3155.7720 | 3650.1957 |
|                                  | O | 1.772652  | 1.620473  | 0.216898  |             |          |           |           |           |
|                                  | H | 1.065268  | 1.524672  | -0.448805 |             |          |           |           |           |
| <b>PC1a</b><br>(C <sub>1</sub> ) | C | 0.550284  | -1.508325 | 0.073064  | -422.116410 | 0.162810 | 54.3330   | 115.2393  | 151.5722  |
|                                  | O | 0.077572  | -0.757660 | -0.972448 |             |          | 160.8381  | 180.7958  | 205.6993  |
|                                  | C | 0.591623  | 0.589120  | -0.877156 |             |          | 225.2059  | 259.6441  | 322.6450  |
|                                  | C | 1.841707  | 0.469973  | -0.002485 |             |          | 375.1046  | 462.0895  | 516.2332  |
|                                  | C | 1.570434  | -0.766896 | 0.870862  |             |          | 558.7026  | 650.6383  | 710.2141  |
|                                  | H | -2.871099 | -1.526719 | 0.500599  |             |          | 797.2582  | 806.4169  | 861.2897  |
|                                  | H | 0.519964  | -2.573810 | -0.098033 |             |          | 915.0364  | 961.2018  | 988.1775  |
|                                  | H | 0.822886  | 0.900434  | -1.896311 |             |          | 1029.2993 | 1052.8564 | 1081.8341 |
|                                  | H | 2.717621  | 0.306933  | -0.627961 |             |          | 1134.4504 | 1181.2711 | 1203.2091 |
|                                  | H | 1.996803  | 1.369508  | 0.588496  |             |          | 1237.8441 | 1254.6764 | 1300.7502 |
|                                  | H | 2.468892  | -1.358312 | 1.046842  |             |          | 1312.0612 | 1343.1498 | 1380.3221 |
|                                  | H | 1.169196  | -0.464590 | 1.839837  |             |          | 1400.5905 | 1419.3024 | 1444.3243 |
|                                  | C | -0.469414 | 1.515992  | -0.308234 |             |          | 1479.1113 | 1497.7639 | 1501.1027 |
|                                  | H | -1.363999 | 1.471291  | -0.936721 |             |          | 1626.3820 | 3046.0513 | 3063.4008 |
|                                  | H | -0.082946 | 2.537005  | -0.346591 |             |          | 3089.3052 | 3094.2847 | 3098.9586 |
|                                  | O | -0.778255 | 1.219095  | 1.032386  |             |          | 3108.4215 | 3151.7411 | 3220.9196 |
|                                  | H | -1.479445 | 0.552589  | 1.023831  |             |          | 3734.2913 | 3769.4579 | 3929.8494 |
|                                  | O | -2.619147 | -0.719477 | 0.047425  |             |          |           |           |           |
|                                  | H | -1.847028 | -0.949173 | -0.489204 |             |          |           |           |           |
| <b>PC1b</b><br>(C <sub>1</sub> ) | C | 0.759967  | 0.855505  | 1.197036  | -422.110475 | 0.161488 | 43.5713   | 59.6040   | 98.0629   |
|                                  | O | 0.111545  | -0.311323 | 0.877638  |             |          | 111.4834  | 142.0017  | 160.3714  |
|                                  | C | -0.355069 | -0.241015 | -0.493014 |             |          | 195.0039  | 268.2012  | 281.1915  |
|                                  | C | 0.429006  | 0.906651  | -1.121504 |             |          | 388.2257  | 394.3085  | 422.1498  |
|                                  | C | 0.704054  | 1.832201  | 0.073903  |             |          | 483.7862  | 507.0696  | 681.1727  |
|                                  | H | 0.796514  | 1.080129  | 2.251566  |             |          | 748.5391  | 840.7230  | 864.2157  |
|                                  | H | 3.209114  | -1.922694 | 0.073441  |             |          | 938.5435  | 968.9865  | 989.5427  |
|                                  | H | -0.141456 | -1.209183 | -0.943154 |             |          | 1036.6748 | 1068.8290 | 1085.6277 |
|                                  | H | 1.364273  | 0.528319  | -1.527755 |             |          | 1126.4775 | 1176.5558 | 1199.2752 |
|                                  | H | -0.135076 | 1.393765  | -1.915009 |             |          | 1230.3480 | 1236.5987 | 1300.7322 |
|                                  | H | 1.630123  | 2.394516  | -0.036154 |             |          | 1322.5990 | 1336.8068 | 1350.9219 |
|                                  | H | -0.105130 | 2.560808  | 0.203549  |             |          | 1383.9444 | 1419.6247 | 1443.7718 |
|                                  | C | -1.851140 | 0.001012  | -0.454176 |             |          | 1482.9919 | 1498.7296 | 1506.1397 |
|                                  | H | -2.246422 | -0.023477 | -1.469833 |             |          | 1622.2611 | 3007.2030 | 3017.6313 |
|                                  | H | -2.045506 | 0.997282  | -0.036481 |             |          | 3099.4592 | 3110.0745 | 3111.1047 |
|                                  | O | -2.524404 | -0.994752 | 0.278683  |             |          | 3126.7599 | 3154.2361 | 3232.3617 |
|                                  | H | -2.068832 | -1.090711 | 1.120958  |             |          | 3812.1674 | 3851.2893 | 3947.2518 |
|                                  | O | 2.387630  | -1.629100 | -0.324125 |             |          |           |           |           |
|                                  | H | 1.823318  | -1.353483 | 0.407835  |             |          |           |           |           |

|                                  |          |           |           |           |             |          |           |           |           |
|----------------------------------|----------|-----------|-----------|-----------|-------------|----------|-----------|-----------|-----------|
| <b>PC2a</b><br>(C <sub>1</sub> ) | C        | -1.754471 | -0.069809 | -0.834435 | -422.104186 | 0.161344 | 35.4497   | 97.0337   | 102.9787  |
|                                  | O        | -0.524823 | -0.754672 | -1.015033 |             |          | 131.4470  | 153.6078  | 204.9433  |
|                                  | C        | -0.056385 | -1.214722 | 0.249674  |             |          | 247.8529  | 260.8466  | 289.9675  |
|                                  | C        | -0.593313 | -0.218847 | 1.292323  |             |          | 323.5906  | 364.4960  | 415.4744  |
|                                  | C        | -1.701182 | 0.454918  | 0.558934  |             |          | 608.9959  | 637.8585  | 672.9617  |
|                                  | H        | -1.829501 | 0.704973  | -1.600446 |             |          | 743.4743  | 848.4181  | 893.0296  |
|                                  | H        | -2.597340 | -0.762774 | -0.977704 |             |          | 940.1032  | 955.7674  | 984.4106  |
|                                  | H        | -0.455450 | -2.216641 | 0.444512  |             |          | 1014.8374 | 1045.4614 | 1089.7717 |
|                                  | H        | -0.929527 | -0.728104 | 2.197929  |             |          | 1120.4431 | 1158.8020 | 1182.3503 |
|                                  | H        | 0.188724  | 0.485431  | 1.596341  |             |          | 1211.9594 | 1252.1184 | 1282.0196 |
|                                  | H        | -2.486523 | 1.035774  | 1.014886  |             |          | 1322.0028 | 1359.4600 | 1373.5462 |
|                                  | H        | -0.157226 | 2.318971  | 0.055123  |             |          | 1394.4347 | 1409.5868 | 1433.7809 |
|                                  | C        | 1.456172  | -1.281188 | 0.154393  |             |          | 1477.6191 | 1506.4806 | 1507.1798 |
|                                  | H        | 1.744212  | -2.070857 | -0.544357 |             |          | 1638.3576 | 2969.0746 | 3026.9136 |
|                                  | H        | 1.881451  | -1.511987 | 1.130509  |             |          | 3032.4843 | 3059.7392 | 3075.2645 |
|                                  | O        | 1.990954  | -0.038961 | -0.256077 |             |          | 3077.6966 | 3124.6776 | 3245.9841 |
|                                  | H        | 1.577239  | 0.171508  | -1.102003 |             |          | 3797.0471 | 3821.6849 | 3898.2559 |
| O                                | 0.741658 | 2.629102  | -0.086592 |           |             |          |           |           |           |
| H                                | 1.296704 | 1.867842  | 0.121486  |           |             |          |           |           |           |
| <b>PC2b</b><br>(C <sub>1</sub> ) | C        | 0.599995  | 0.692473  | 1.307887  | -422.104568 | 0.160866 | 35.4109   | 70.9268   | 101.4270  |
|                                  | O        | 0.125931  | -0.517875 | 0.704099  |             |          | 140.4914  | 145.0570  | 153.0285  |
|                                  | C        | -0.425199 | -0.203749 | -0.587447 |             |          | 199.2380  | 264.6953  | 290.6530  |
|                                  | C        | 0.391414  | 0.985136  | -1.097303 |             |          | 337.1283  | 389.6238  | 416.0197  |
|                                  | C        | 0.810986  | 1.633442  | 0.175711  |             |          | 518.5067  | 579.1657  | 729.2645  |
|                                  | H        | -0.135968 | 1.060201  | 2.034366  |             |          | 753.5204  | 839.5213  | 886.5684  |
|                                  | H        | 1.517140  | 0.453980  | 1.853647  |             |          | 954.1915  | 969.1765  | 975.8977  |
|                                  | H        | -0.310047 | -1.102357 | -1.192538 |             |          | 1017.5104 | 1060.9375 | 1070.4496 |
|                                  | H        | 1.254627  | 0.637739  | -1.673658 |             |          | 1108.4872 | 1134.3415 | 1201.4170 |
|                                  | H        | -0.201077 | 1.640018  | -1.740491 |             |          | 1210.5179 | 1236.4679 | 1287.6979 |
|                                  | H        | 3.048256  | -2.089207 | -0.209427 |             |          | 1315.3583 | 1342.5102 | 1358.6553 |
|                                  | H        | 1.340096  | 2.567470  | 0.259074  |             |          | 1378.2012 | 1406.8661 | 1441.7598 |
|                                  | C        | -1.897332 | 0.126340  | -0.422775 |             |          | 1472.9426 | 1504.2072 | 1515.9183 |
|                                  | H        | -2.355109 | 0.262156  | -1.402827 |             |          | 1621.4557 | 2996.3459 | 3010.4496 |
|                                  | H        | -1.994941 | 1.070974  | 0.129085  |             |          | 3036.1344 | 3056.5711 | 3079.4502 |
|                                  | O        | -2.588684 | -0.914692 | 0.225860  |             |          | 3105.9816 | 3118.0323 | 3257.0971 |
|                                  | H        | -2.048177 | -1.189559 | 0.973907  |             |          | 3733.3475 | 3844.0505 | 3939.1142 |
| O                                | 2.615609 | -1.246814 | -0.357766 |           |             |          |           |           |           |
| H                                | 1.783177 | -1.278213 | 0.134882  |           |             |          |           |           |           |
| <b>PC3a</b><br>(C <sub>1</sub> ) | C        | 1.944570  | -0.635110 | -0.583055 | -422.106658 | 0.161588 | 32.6812   | 94.9825   | 103.3145  |
|                                  | O        | 1.394584  | 0.677380  | -0.510404 |             |          | 116.1548  | 183.4929  | 199.2200  |
|                                  | C        | 0.639885  | 0.786845  | 0.697041  |             |          | 242.8189  | 274.3093  | 315.3311  |
|                                  | C        | 0.302669  | -0.619485 | 1.065707  |             |          | 326.9942  | 390.1262  | 464.3176  |
|                                  | C        | 0.904519  | -1.546409 | 0.070637  |             |          | 627.6451  | 650.3092  | 663.2750  |
|                                  | H        | 2.138818  | -0.855322 | -1.630113 |             |          | 740.3313  | 876.3544  | 880.8501  |
|                                  | H        | 2.888346  | -0.667980 | -0.029943 |             |          | 905.8377  | 955.4880  | 1007.5309 |
|                                  | H        | 1.245185  | 1.282324  | 1.470922  |             |          | 1019.5378 | 1040.2472 | 1086.8228 |
|                                  | H        | -0.439341 | -0.886478 | 1.799428  |             |          | 1105.2788 | 1152.3744 | 1200.1754 |
|                                  | H        | -3.390814 | -1.385526 | -0.426300 |             |          | 1210.3244 | 1259.3310 | 1293.9312 |
|                                  | H        | 1.348176  | -2.438361 | 0.514161  |             |          | 1303.1178 | 1338.6101 | 1340.1398 |
|                                  | H        | 0.151120  | -1.878736 | -0.653398 |             |          | 1396.6138 | 1398.4048 | 1427.2556 |
|                                  | C        | -0.559106 | 1.675814  | 0.387827  |             |          | 1480.5057 | 1507.0599 | 1526.4989 |
|                                  | H        | -0.215316 | 2.691830  | 0.177208  |             |          | 1633.9325 | 2971.2185 | 3018.0590 |
|                                  | H        | -1.234072 | 1.701939  | 1.242150  |             |          | 3039.9467 | 3057.7538 | 3097.1960 |

|                                  |   |           |           |           |             |          |           |           |           |
|----------------------------------|---|-----------|-----------|-----------|-------------|----------|-----------|-----------|-----------|
|                                  | O | -1.288611 | 1.166808  | -0.714261 |             |          | 3129.5042 | 3137.8936 | 3254.7588 |
|                                  | H | -0.640401 | 0.998296  | -1.408805 |             |          | 3698.8316 | 3819.0001 | 3933.1864 |
|                                  | O | -2.491691 | -1.351984 | -0.095285 |             |          |           |           |           |
|                                  | H | -2.161171 | -0.469544 | -0.324650 |             |          |           |           |           |
| <b>PC3b</b><br>(C <sub>i</sub> ) | C | 2.382056  | 0.081438  | 0.057030  | -422.099027 | 0.160706 | 44.8819   | 62.5064   | 95.2650   |
|                                  | O | 1.401257  | 0.514412  | 0.992982  |             |          | 133.1562  | 148.0571  | 166.7245  |
|                                  | C | 0.112342  | 0.217344  | 0.475796  |             |          | 196.2697  | 237.9754  | 266.1232  |
|                                  | C | 0.332180  | -0.861059 | -0.532724 |             |          | 293.5736  | 359.5887  | 436.0657  |
|                                  | C | 1.788728  | -1.162080 | -0.610889 |             |          | 471.5867  | 508.4847  | 640.7375  |
|                                  | H | 2.565987  | 0.862823  | -0.687531 |             |          | 747.2007  | 859.9959  | 887.3331  |
|                                  | H | 3.301503  | -0.104625 | 0.606718  |             |          | 957.4629  | 965.9392  | 1017.3645 |
|                                  | H | -0.521159 | -0.104949 | 1.309784  |             |          | 1053.6666 | 1063.5527 | 1070.4438 |
|                                  | H | -2.126043 | -1.946933 | 0.437345  |             |          | 1108.2033 | 1156.3906 | 1203.7513 |
|                                  | H | -0.432777 | -1.233732 | -1.193916 |             |          | 1220.9676 | 1244.6190 | 1256.7556 |
|                                  | H | 2.044903  | -2.062604 | -0.041021 |             |          | 1301.9822 | 1312.8653 | 1345.8617 |
|                                  | H | 2.148181  | -1.306438 | -1.629426 |             |          | 1376.2490 | 1397.7421 | 1439.2833 |
|                                  | C | -0.512017 | 1.475736  | -0.122763 |             |          | 1474.5513 | 1522.5366 | 1528.3042 |
|                                  | H | 0.128362  | 1.854941  | -0.924721 |             |          | 1643.2081 | 3015.3065 | 3028.4093 |
|                                  | H | -0.597862 | 2.235307  | 0.657081  |             |          | 3033.3223 | 3043.3622 | 3095.8524 |
|                                  | O | -1.787898 | 1.104607  | -0.625087 |             |          | 3108.9291 | 3137.1720 | 3252.6540 |
|                                  | H | -2.269638 | 1.882383  | -0.912206 |             |          | 3779.0820 | 3901.3336 | 3929.0785 |
|                                  | O | -2.894953 | -1.374252 | 0.470633  |             |          |           |           |           |
|                                  | H | -2.608443 | -0.542589 | 0.070973  |             |          |           |           |           |
| <b>PC4</b><br>(C <sub>i</sub> )  | C | 1.962077  | -0.175288 | -1.028207 | -422.111046 | 0.162377 | 36.1189   | 40.5986   | 82.0405   |
|                                  | O | 0.732383  | -0.821630 | -0.689941 |             |          | 110.5671  | 177.8647  | 187.5694  |
|                                  | C | 0.107999  | -0.058813 | 0.261823  |             |          | 203.0496  | 231.1079  | 247.7931  |
|                                  | C | 1.089793  | 0.851589  | 0.943896  |             |          | 362.9477  | 380.7732  | 425.3401  |
|                                  | C | 2.422386  | 0.464127  | 0.276872  |             |          | 582.1361  | 614.5260  | 685.3976  |
|                                  | H | 2.636495  | -0.929270 | -1.423953 |             |          | 814.2249  | 881.2781  | 896.2933  |
|                                  | H | 1.766089  | 0.577131  | -1.796541 |             |          | 942.5309  | 955.4662  | 1013.6984 |
|                                  | H | -1.775969 | 1.722955  | -0.785375 |             |          | 1055.9857 | 1078.9621 | 1091.5259 |
|                                  | H | 0.844830  | 1.902299  | 0.773619  |             |          | 1166.3365 | 1196.4822 | 1216.2233 |
|                                  | H | 1.108890  | 0.701307  | 2.025640  |             |          | 1260.9163 | 1276.8830 | 1287.8748 |
|                                  | H | 3.084964  | 1.310469  | 0.115182  |             |          | 1334.0678 | 1346.9556 | 1352.9834 |
|                                  | H | 2.945799  | -0.273926 | 0.882821  |             |          | 1405.1548 | 1446.6883 | 1485.7284 |
|                                  | C | -1.022282 | -0.750429 | 0.931057  |             |          | 1492.5048 | 1502.3425 | 1526.0308 |
|                                  | H | -1.536359 | -0.052966 | 1.590442  |             |          | 1646.4915 | 2970.6970 | 3051.5964 |
|                                  | H | -0.648849 | -1.587797 | 1.540412  |             |          | 3054.4114 | 3077.9136 | 3098.0615 |
|                                  | O | -1.986266 | -1.233392 | 0.005251  |             |          | 3126.5632 | 3149.6218 | 3157.7524 |
|                                  | H | -1.516343 | -1.707585 | -0.687899 |             |          | 3780.1637 | 3854.0808 | 3914.8410 |
|                                  | O | -2.691129 | 1.528346  | -0.569567 |             |          |           |           |           |
|                                  | H | -2.709287 | 0.563660  | -0.512938 |             |          |           |           |           |
| <b>PC5</b><br>(C <sub>i</sub> )  | C | -1.330798 | -1.073786 | -0.821181 | -422.111029 | 0.162481 | 32.8961   | 59.7595   | 87.1787   |
|                                  | O | -0.005929 | -0.600804 | -0.548360 |             |          | 115.3213  | 160.5024  | 186.0194  |
|                                  | C | -0.005960 | 0.265407  | 0.602994  |             |          | 199.3251  | 276.1905  | 291.3035  |
|                                  | C | -1.456202 | 0.753301  | 0.687976  |             |          | 324.8667  | 499.5630  | 548.1309  |
|                                  | C | -2.223557 | -0.499785 | 0.277902  |             |          | 561.8600  | 601.2783  | 663.2919  |
|                                  | H | -1.625514 | -0.711508 | -1.807737 |             |          | 682.2273  | 845.8792  | 889.2955  |
|                                  | H | -1.320296 | -2.162641 | -0.837318 |             |          | 905.6400  | 947.6845  | 979.4995  |
|                                  | H | 0.250028  | -0.314339 | 1.495680  |             |          | 1022.9575 | 1054.5711 | 1105.0601 |
|                                  | H | -1.707082 | 1.117243  | 1.681260  |             |          | 1138.2749 | 1181.0924 | 1199.4827 |
|                                  | H | -1.607641 | 1.559547  | -0.032030 |             |          | 1215.3066 | 1267.8767 | 1301.8010 |

|                                 |   |           |           |           |             |          |           |           |           |
|---------------------------------|---|-----------|-----------|-----------|-------------|----------|-----------|-----------|-----------|
|                                 | H | -2.284885 | -1.192172 | 1.117488  |             |          | 1327.2595 | 1341.3523 | 1346.4994 |
|                                 | H | -3.232750 | -0.298963 | -0.074247 |             |          | 1389.3059 | 1399.0338 | 1459.2464 |
|                                 | C | 1.033397  | 1.302188  | 0.377530  |             |          | 1488.0111 | 1503.3768 | 1539.5128 |
|                                 | H | 2.932611  | -0.843480 | 0.439631  |             |          | 1648.0489 | 3045.6742 | 3065.4143 |
|                                 | H | 1.379182  | 1.926955  | 1.186891  |             |          | 3078.2738 | 3087.0768 | 3118.4484 |
|                                 | O | 1.060152  | 1.900621  | -0.838647 |             |          | 3144.5248 | 3152.4791 | 3228.5056 |
|                                 | H | 0.748813  | 1.250811  | -1.482725 |             |          | 3794.6110 | 3799.0117 | 3915.6375 |
|                                 | O | 2.527857  | -1.709861 | 0.348795  |             |          |           |           |           |
|                                 | H | 1.709611  | -1.535054 | -0.132519 |             |          |           |           |           |
| <b>PC6</b><br>(C <sub>1</sub> ) | C | 1.044210  | -1.425736 | -0.322945 | -422.094284 | 0.161073 | 15.1730   | 71.9705   | 97.6470   |
|                                 | O | 0.194897  | -0.524765 | -1.031649 |             |          | 133.5906  | 171.6202  | 184.3406  |
|                                 | C | 0.556783  | 0.821153  | -0.717550 |             |          | 251.9533  | 268.0713  | 306.5254  |
|                                 | C | 1.540705  | 0.742707  | 0.463973  |             |          | 338.1741  | 472.1512  | 562.0102  |
|                                 | C | 1.373764  | -0.693591 | 0.965734  |             |          | 587.1333  | 634.4392  | 749.8539  |
|                                 | H | 0.494085  | -2.353427 | -0.180098 |             |          | 797.0602  | 898.0458  | 913.1561  |
|                                 | H | 1.944844  | -1.624679 | -0.912280 |             |          | 936.4986  | 953.3738  | 1009.8486 |
|                                 | H | 1.021683  | 1.275468  | -1.597191 |             |          | 1042.8559 | 1075.4655 | 1114.0531 |
|                                 | H | 2.559372  | 0.909529  | 0.116695  |             |          | 1137.5030 | 1193.8533 | 1207.4026 |
|                                 | H | 1.314646  | 1.483757  | 1.228203  |             |          | 1214.9615 | 1281.5482 | 1322.3553 |
|                                 | H | 2.262212  | -1.080053 | 1.459790  |             |          | 1329.5460 | 1353.1296 | 1360.4139 |
|                                 | H | 0.526538  | -0.760557 | 1.647247  |             |          | 1392.5832 | 1397.8517 | 1406.0035 |
|                                 | C | -0.717451 | 1.582897  | -0.393118 |             |          | 1486.5947 | 1501.3662 | 1528.0901 |
|                                 | H | -1.471368 | 1.431528  | -1.181534 |             |          | 1642.1965 | 2973.2647 | 2999.2037 |
|                                 | H | -0.539323 | 2.669273  | -0.370461 |             |          | 3039.0419 | 3052.7951 | 3092.7590 |
|                                 | O | -1.296496 | 1.234431  | 0.799134  |             |          | 3094.9621 | 3137.2967 | 3138.3427 |
|                                 | H | -2.350142 | -0.861614 | 0.881354  |             |          | 3154.7345 | 3764.6850 | 3915.4020 |
|                                 | O | -2.275586 | -1.474300 | 0.145608  |             |          |           |           |           |
|                                 | H | -1.533132 | -1.136732 | -0.373031 |             |          |           |           |           |
| <b>P1</b><br>(C <sub>1</sub> )  | C | -1.456844 | -0.953089 | -0.268620 | -345.770116 | 0.137691 | 79.6560   | 141.1014  | 234.5072  |
|                                 | O | -0.284481 | -1.086219 | 0.423733  |             |          | 280.4926  | 319.3811  | 413.5837  |
|                                 | C | 0.245995  | 0.216567  | 0.732421  |             |          | 508.3416  | 597.7934  | 665.8075  |
|                                 | C | -0.568288 | 1.195166  | -0.110611 |             |          | 749.1775  | 846.6505  | 868.3115  |
|                                 | C | -1.907893 | 0.467972  | -0.272262 |             |          | 918.1762  | 964.6199  | 995.4381  |
|                                 | H | -2.088508 | -1.828012 | -0.253106 |             |          | 1012.6812 | 1059.2927 | 1086.6122 |
|                                 | H | 0.091888  | 0.391558  | 1.801453  |             |          | 1135.3943 | 1174.3792 | 1210.3191 |
|                                 | H | -0.656835 | 2.165936  | 0.371292  |             |          | 1236.4163 | 1242.0229 | 1298.5639 |
|                                 | H | -0.086427 | 1.320820  | -1.079592 |             |          | 1316.5652 | 1343.4515 | 1364.8766 |
|                                 | H | -2.571186 | 0.687307  | 0.574340  |             |          | 1393.5096 | 1414.6323 | 1431.0483 |
|                                 | H | -2.437490 | 0.741505  | -1.183159 |             |          | 1484.0285 | 1501.0906 | 1507.6078 |
|                                 | C | 1.731791  | 0.182582  | 0.433245  |             |          | 2997.2517 | 3040.8766 | 3054.6974 |
|                                 | H | 2.216464  | -0.533434 | 1.103866  |             |          | 3096.3604 | 3114.1384 | 3116.5431 |
|                                 | H | 2.162584  | 1.167512  | 0.615185  |             |          | 3152.7483 | 3226.2076 | 3845.0972 |
|                                 | O | 1.982675  | -0.139802 | -0.915048 |             |          |           |           |           |
|                                 | H | 1.515387  | -0.960207 | -1.104787 |             |          |           |           |           |
| <b>P2</b><br>(C <sub>1</sub> )  | C | -1.704746 | -0.821039 | -0.112183 | -345.762156 | 0.136346 | 110.6448  | 121.9646  | 174.6688  |
|                                 | O | -0.334371 | -1.068543 | 0.174330  |             |          | 240.1557  | 283.8451  | 317.2617  |
|                                 | C | 0.235697  | 0.122870  | 0.712002  |             |          | 435.3048  | 604.8862  | 668.5215  |
|                                 | C | -0.480695 | 1.270171  | -0.010431 |             |          | 740.2060  | 861.6998  | 892.0230  |
|                                 | C | -1.792718 | 0.649366  | -0.335642 |             |          | 942.5015  | 955.2329  | 974.6136  |
|                                 | H | -1.985521 | -1.421320 | -0.981233 |             |          | 1008.3222 | 1047.6849 | 1086.6387 |
|                                 | H | -2.328744 | -1.149886 | 0.731934  |             |          | 1121.0622 | 1158.5521 | 1186.2040 |

|                                     |   |           |           |           |             |          |           |           |           |
|-------------------------------------|---|-----------|-----------|-----------|-------------|----------|-----------|-----------|-----------|
|                                     | H | 0.031884  | 0.171387  | 1.788931  |             |          | 1204.3229 | 1250.7781 | 1274.0534 |
|                                     | H | -0.560820 | 2.161445  | 0.614131  |             |          | 1323.8951 | 1355.7000 | 1363.0941 |
|                                     | H | 0.079376  | 1.545580  | -0.911796 |             |          | 1392.4192 | 1410.3672 | 1434.2372 |
|                                     | H | -2.667378 | 1.161609  | -0.699156 |             |          | 1474.8543 | 1507.0812 | 1507.7509 |
|                                     | C | 1.731401  | 0.042885  | 0.484925  |             |          | 2972.5445 | 3013.0870 | 3022.6692 |
|                                     | H | 2.136986  | -0.788605 | 1.069484  |             |          | 3046.5132 | 3060.2159 | 3088.2091 |
|                                     | H | 2.204038  | 0.963978  | 0.826241  |             |          | 3114.0914 | 3258.5560 | 3842.6041 |
|                                     | O | 2.040444  | -0.105343 | -0.882155 |             |          |           |           |           |
|                                     | H | 1.507968  | -0.838613 | -1.207958 |             |          |           |           |           |
| <b>P3</b><br><b>(C<sub>i</sub>)</b> | C | 1.672292  | -0.738107 | 0.161872  | -345.761325 | 0.136658 | 77.5886   | 124.3698  | 231.8574  |
|                                     | O | 0.331799  | -1.117372 | -0.117889 |             |          | 254.0735  | 295.2282  | 350.8290  |
|                                     | C | -0.301254 | -0.045897 | -0.818637 |             |          | 415.8454  | 637.0883  | 651.9304  |
|                                     | C | 0.480198  | 1.166803  | -0.435950 |             |          | 738.1750  | 876.5874  | 879.4660  |
|                                     | C | 1.614880  | 0.766378  | 0.438641  |             |          | 901.7759  | 953.1732  | 1003.9482 |
|                                     | H | 2.020439  | -1.334590 | 1.001820  |             |          | 1021.9153 | 1034.6424 | 1085.1503 |
|                                     | H | 2.304882  | -0.942169 | -0.708277 |             |          | 1112.5851 | 1160.2851 | 1201.3249 |
|                                     | H | -0.255238 | -0.235418 | -1.902199 |             |          | 1212.6093 | 1260.6652 | 1292.2941 |
|                                     | H | 0.146861  | 2.175441  | -0.616055 |             |          | 1302.8165 | 1338.2887 | 1340.4007 |
|                                     | H | 2.552294  | 1.273201  | 0.206404  |             |          | 1398.7402 | 1399.4186 | 1424.9857 |
|                                     | H | 1.389765  | 0.956722  | 1.494956  |             |          | 1473.1674 | 1505.1323 | 1525.7605 |
|                                     | C | -1.764622 | -0.031286 | -0.396377 |             |          | 2965.9931 | 3010.6680 | 3036.5417 |
|                                     | H | -2.237913 | -0.959176 | -0.733145 |             |          | 3040.8911 | 3094.9943 | 3118.2917 |
|                                     | H | -2.273097 | 0.807261  | -0.871540 |             |          | 3136.9863 | 3253.0332 | 3846.3591 |
|                                     | O | -1.896613 | 0.128924  | 0.996179  |             |          |           |           |           |
|                                     | H | -1.338448 | -0.541036 | 1.404420  |             |          |           |           |           |
| <b>P4</b><br><b>(C<sub>i</sub>)</b> | C | -1.590473 | -0.929268 | 0.222803  | -345.769834 | 0.138076 | 81.1006   | 95.8244   | 187.9505  |
|                                     | O | -0.290973 | -1.050040 | -0.368293 |             |          | 232.4892  | 297.8083  | 371.8209  |
|                                     | C | 0.267703  | 0.195953  | -0.513286 |             |          | 499.8709  | 626.8352  | 673.2150  |
|                                     | C | -0.592414 | 1.219099  | 0.155041  |             |          | 810.7182  | 883.2263  | 906.2530  |
|                                     | C | -1.965151 | 0.543413  | 0.090663  |             |          | 917.3941  | 946.2871  | 1006.6771 |
|                                     | H | -2.265077 | -1.608333 | -0.293551 |             |          | 1018.1627 | 1068.3723 | 1078.2453 |
|                                     | H | -1.516752 | -1.228793 | 1.270981  |             |          | 1159.2104 | 1183.6766 | 1218.0362 |
|                                     | H | -0.279463 | 1.368518  | 1.196657  |             |          | 1261.0039 | 1275.7787 | 1298.2802 |
|                                     | H | -0.560633 | 2.186350  | -0.343088 |             |          | 1338.0783 | 1353.2860 | 1361.0548 |
|                                     | H | -2.649951 | 0.866607  | 0.870816  |             |          | 1415.1796 | 1418.4383 | 1481.9269 |
|                                     | H | -2.426282 | 0.727949  | -0.878930 |             |          | 1493.1907 | 1498.7754 | 1531.3225 |
|                                     | C | 1.746954  | 0.196314  | -0.546583 |             |          | 3002.2410 | 3052.7744 | 3058.3275 |
|                                     | H | 2.110444  | 1.189768  | -0.801884 |             |          | 3092.1573 | 3121.4113 | 3134.0746 |
|                                     | H | 2.103098  | -0.508306 | -1.303016 |             |          | 3134.4428 | 3151.9286 | 3871.4280 |
|                                     | O | 2.323877  | -0.118543 | 0.726049  |             |          |           |           |           |
|                                     | H | 2.021675  | -0.998163 | 0.968141  |             |          |           |           |           |
| <b>P5</b><br><b>(C<sub>i</sub>)</b> | C | -1.332571 | -1.090999 | -0.102851 | -345.768457 | 0.138102 | 67.2098   | 116.7800  | 208.1019  |
|                                     | O | -0.093677 | -0.961361 | 0.601182  |             |          | 278.5696  | 388.3998  | 502.8235  |
|                                     | C | 0.294206  | 0.417442  | 0.664245  |             |          | 597.5031  | 605.8756  | 653.7112  |
|                                     | C | -0.940107 | 1.217575  | 0.261684  |             |          | 770.3687  | 850.6390  | 880.9810  |
|                                     | C | -1.607750 | 0.268578  | -0.734123 |             |          | 912.0080  | 945.5431  | 978.7902  |
|                                     | H | -1.238133 | -1.893533 | -0.832844 |             |          | 1000.4268 | 1065.4845 | 1110.7652 |
|                                     | H | -2.111807 | -1.360082 | 0.614535  |             |          | 1139.7981 | 1187.8302 | 1206.0873 |
|                                     | H | 0.594007  | 0.608239  | 1.701863  |             |          | 1213.7271 | 1266.8363 | 1299.6754 |
|                                     | H | -1.581577 | 1.383251  | 1.127230  |             |          | 1323.8470 | 1334.4503 | 1348.4379 |
|                                     | H | -0.679138 | 2.181145  | -0.172047 |             |          | 1363.0472 | 1397.6739 | 1461.4872 |
|                                     | H | -2.670859 | 0.458021  | -0.863362 |             |          | 1486.2538 | 1498.2746 | 1535.9816 |

|                                |   |           |           |           |             |          |           |           |           |
|--------------------------------|---|-----------|-----------|-----------|-------------|----------|-----------|-----------|-----------|
|                                | H | -1.116600 | 0.343413  | -1.703737 |             |          | 3004.8043 | 3053.8197 | 3085.7651 |
|                                | C | 1.438078  | 0.623994  | -0.277176 |             |          | 3092.5037 | 3117.1342 | 3139.5091 |
|                                | H | 1.860970  | 1.608060  | -0.424464 |             |          | 3151.4683 | 3206.5032 | 3770.9442 |
|                                | O | 2.338439  | -0.382889 | -0.375343 |             |          |           |           |           |
|                                | H | 1.873904  | -1.194059 | -0.124564 |             |          |           |           |           |
| <b>P6</b><br>(C <sub>1</sub> ) | C | 1.375912  | -0.858212 | 0.292749  | -345.748530 | 0.136528 | 45.9161   | 122.2087  | 168.0174  |
|                                | O | 0.411582  | -1.039045 | -0.748059 |             |          | 258.9275  | 351.8936  | 478.1738  |
|                                | C | -0.352916 | 0.131504  | -0.921535 |             |          | 629.3087  | 732.6342  | 804.7839  |
|                                | C | 0.520562  | 1.268514  | -0.395543 |             |          | 839.0881  | 868.2832  | 889.9675  |
|                                | C | 1.262290  | 0.596466  | 0.761752  |             |          | 922.3740  | 946.8107  | 977.9068  |
|                                | H | 1.166584  | -1.563281 | 1.096476  |             |          | 1040.2966 | 1057.4158 | 1116.8455 |
|                                | H | 2.359532  | -1.078190 | -0.125276 |             |          | 1136.1628 | 1163.6398 | 1204.4744 |
|                                | H | -0.578209 | 0.239074  | -1.984469 |             |          | 1220.1908 | 1247.8229 | 1267.6782 |
|                                | H | 1.218914  | 1.572421  | -1.175021 |             |          | 1321.1558 | 1332.0455 | 1351.0722 |
|                                | H | -0.056834 | 2.139587  | -0.091123 |             |          | 1380.9926 | 1407.5096 | 1424.6120 |
|                                | H | 2.235190  | 1.044597  | 0.950354  |             |          | 1489.4238 | 1504.0114 | 1533.4208 |
|                                | H | 0.674414  | 0.655323  | 1.675444  |             |          | 2945.3841 | 3018.9351 | 3066.6192 |
|                                | C | -1.694947 | 0.014429  | -0.181399 |             |          | 3075.5029 | 3089.4509 | 3098.2300 |
|                                | H | -2.179767 | -0.903140 | -0.557171 |             |          | 3112.5390 | 3135.9726 | 3151.1465 |
|                                | H | -2.351008 | 0.864910  | -0.411621 |             |          |           |           |           |
|                                | O | -1.555860 | -0.196893 | 1.158843  |             |          |           |           |           |

**Table S2:** T1 diagnostics for the species involved in THFA + •OH reaction calculated at CCSD(T)/cc-pVTZ based on the M06-2X/aug-cc-pVTZ geometries.

| No. | Species          | T1 diagnostics |
|-----|------------------|----------------|
| 1   | THFA             | 0.01044046     |
| 2   | •OH              | 0.00704816     |
| 3   | RC               | 0.01103182     |
| 4   | TS1a             | 0.01737949     |
| 5   | TS1b             | 0.01662276     |
| 6   | TS2a             | 0.01560761     |
| 7   | TS2b             | 0.01571134     |
| 8   | TS3a             | 0.01572722     |
| 9   | TS3b             | 0.01523644     |
| 10  | TS4              | 0.01647617     |
| 11  | TS5              | 0.01645527     |
| 12  | TS6              | 0.02110088     |
| 13  | PC1a             | 0.01292513     |
| 14  | PC1b             | 0.01258271     |
| 15  | PC2a             | 0.01150485     |
| 16  | PC2b             | 0.01129716     |
| 17  | PC3a             | 0.01136321     |
| 18  | PC3b             | 0.01131811     |
| 19  | PC4              | 0.01305098     |
| 20  | PC5              | 0.01274914     |
| 21  | PC6              | 0.01340023     |
| 22  | P1               | 0.01328370     |
| 23  | P2               | 0.01166460     |
| 24  | P3               | 0.01174922     |
| 25  | P4               | 0.01370887     |
| 26  | P5               | 0.01327101     |
| 27  | P6               | 0.01718661     |
| 28  | H <sub>2</sub> O | 0.00652040     |

**Table S3:** Calculated global rate constants,  $k_{\text{tot}}$ , of the THFA +  $\bullet\text{OH} \rightarrow$  products over the range of temperature 200 – 2000 K at different pressures, including the HIR treatments and Eckart quantum tunneling effects. Units are in  $\text{cm}^3/\text{molecule}/\text{s}$ .

| <b>T (K)</b> | <b>0.76 Torr</b> | <b>7.6 Torr</b> | <b>76 Torr</b>  | <b>760 Torr</b> | <b>7,600 Torr</b> | <b>76,000 Torr</b> |
|--------------|------------------|-----------------|-----------------|-----------------|-------------------|--------------------|
| 200          | 8.77E-11         | 9.03E-11        | 9.85E-11        | 1.52E-10        | 3.02E-10          | 3.86E-10           |
| 240          | 5.07E-11         | 5.35E-11        | 5.68E-11        | 7.62E-11        | 1.74E-10          | 3.42E-10           |
| <b>298</b>   | <b>2.35E-11</b>  | <b>2.44E-11</b> | <b>2.62E-11</b> | <b>3.02E-11</b> | <b>4.56E-11</b>   | <b>1.45E-10</b>    |
| 300          | 2.29E-11         | 2.38E-11        | 2.56E-11        | 2.93E-11        | 4.35E-11          | 1.37E-10           |
| 400          | 7.08E-12         | 7.25E-12        | 7.51E-12        | 8.03E-12        | 8.84E-12          | 1.21E-11           |
| 440          | 4.73E-12         | 4.79E-12        | 4.92E-12        | 5.17E-12        | 5.59E-12          | 7.47E-12           |
| 500          | 2.75E-12         | 2.79E-12        | 2.84E-12        | 2.92E-12        | 3.07E-12          | 3.91E-12           |
| 600          | 1.36E-12         | 1.36E-12        | 1.36E-12        | 1.40E-12        | 1.43E-12          | 1.66E-12           |
| 700          | 8.63E-13         | 8.69E-13        | 8.69E-13        | 8.80E-13        | 8.85E-13          | 9.69E-13           |
| 800          | 7.22E-13         | 7.18E-13        | 7.19E-13        | 7.27E-13        | 7.29E-13          | 7.50E-13           |
| 900          | 7.47E-13         | 7.40E-13        | 7.40E-13        | 7.42E-13        | 7.34E-13          | 7.52E-13           |
| 1000         | 8.60E-13         | 8.57E-13        | 8.67E-13        | 8.69E-13        | 8.65E-13          | 8.67E-13           |
| 1100         | 1.06E-12         | 1.06E-12        | 1.06E-12        | 1.05E-12        | 1.06E-12          | 1.06E-12           |
| 1200         | 1.31E-12         | 1.32E-12        | 1.31E-12        | 1.32E-12        | 1.32E-12          | 1.31E-12           |
| 1300         | 1.63E-12         | 1.64E-12        | 1.64E-12        | 1.64E-12        | 1.64E-12          | 1.64E-12           |
| 1400         | 2.02E-12         | 2.01E-12        | 2.01E-12        | 2.01E-12        | 2.01E-12          | 2.01E-12           |
| 1500         | 2.45E-12         | 2.46E-12        | 2.45E-12        | 2.45E-12        | 2.45E-12          | 2.45E-12           |
| 1600         | 2.96E-12         | 2.97E-12        | 2.94E-12        | 2.96E-12        | 2.96E-12          | 2.95E-12           |
| 1700         | 3.53E-12         | 3.52E-12        | 3.51E-12        | 3.50E-12        | 3.53E-12          | 3.53E-12           |
| 1800         | 4.17E-12         | 4.15E-12        | 4.13E-12        | 4.15E-12        | 4.16E-12          | 4.16E-12           |
| 1900         | 4.86E-12         | 4.87E-12        | 4.86E-12        | 4.86E-12        | 4.87E-12          | 4.87E-12           |
| 2000         | 5.61E-12         | 5.63E-12        | 5.62E-12        | 5.62E-12        | 5.64E-12          | 5.61E-12           |

**Table S4:** The calculated Eckart tunneling factor via tight transition state channels over the wide range of temperature 200 – 2000 K.

| T (K)      | via TS1a    | via TS1b    | via TS2a    | via TS2b    | via TS3a    | via TS3b    | via TS4     | via TS5     | via TS6      |
|------------|-------------|-------------|-------------|-------------|-------------|-------------|-------------|-------------|--------------|
| 200        | 4.38        | 4.24        | 6.54        | 2.69        | 12.30       | 10.90       | 2.54        | 6.24        | 1330.00      |
| 240        | 2.64        | 2.57        | 3.42        | 2.08        | 5.17        | 5.44        | 1.87        | 3.31        | 143.00       |
| <b>298</b> | <b>1.84</b> | <b>1.80</b> | <b>2.16</b> | <b>1.66</b> | <b>2.78</b> | <b>3.08</b> | <b>1.49</b> | <b>2.11</b> | <b>23.40</b> |
| 300        | 1.82        | 1.79        | 2.13        | 1.65        | 2.74        | 3.04        | 1.48        | 2.09        | 22.40        |
| 400        | 1.40        | 1.38        | 1.52        | 1.35        | 1.75        | 1.91        | 1.25        | 1.50        | 5.55         |
| 440        | 1.32        | 1.30        | 1.42        | 1.29        | 1.59        | 1.72        | 1.20        | 1.40        | 4.12         |
| 500        | 1.24        | 1.23        | 1.31        | 1.22        | 1.43        | 1.53        | 1.15        | 1.30        | 3.00         |
| 600        | 1.16        | 1.16        | 1.21        | 1.15        | 1.29        | 1.35        | 1.11        | 1.20        | 2.17         |
| 700        | 1.12        | 1.11        | 1.15        | 1.11        | 1.21        | 1.26        | 1.08        | 1.15        | 1.79         |
| 800        | 1.09        | 1.09        | 1.12        | 1.08        | 1.16        | 1.20        | 1.06        | 1.11        | 1.57         |
| 900        | 1.07        | 1.07        | 1.09        | 1.06        | 1.13        | 1.15        | 1.05        | 1.09        | 1.44         |
| 1000       | 1.06        | 1.06        | 1.08        | 1.05        | 1.10        | 1.13        | 1.04        | 1.07        | 1.35         |
| 1100       | 1.05        | 1.05        | 1.06        | 1.04        | 1.09        | 1.10        | 1.03        | 1.06        | 1.29         |
| 1200       | 1.04        | 1.04        | 1.05        | 1.03        | 1.07        | 1.09        | 1.03        | 1.05        | 1.25         |
| 1300       | 1.04        | 1.03        | 1.05        | 1.03        | 1.06        | 1.08        | 1.02        | 1.04        | 1.21         |
| 1400       | 1.03        | 1.03        | 1.04        | 1.02        | 1.05        | 1.07        | 1.02        | 1.04        | 1.18         |
| 1500       | 1.03        | 1.03        | 1.04        | 1.02        | 1.05        | 1.06        | 1.02        | 1.03        | 1.16         |
| 1600       | 1.02        | 1.02        | 1.03        | 1.02        | 1.04        | 1.05        | 1.02        | 1.03        | 1.14         |
| 1700       | 1.02        | 1.02        | 1.03        | 1.02        | 1.04        | 1.05        | 1.01        | 1.03        | 1.13         |
| 1800       | 1.02        | 1.02        | 1.03        | 1.01        | 1.03        | 1.04        | 1.01        | 1.02        | 1.12         |
| 1900       | 1.02        | 1.02        | 1.02        | 1.01        | 1.03        | 1.04        | 1.01        | 1.02        | 1.11         |
| 2000       | 1.02        | 1.02        | 1.02        | 1.01        | 1.03        | 1.03        | 1.01        | 1.02        | 1.10         |

**Table S5:** Calculated overall rate constants,  $k_{\text{tot}}$ , of the THFA +  $\bullet\text{OH} \rightarrow$  products over the range of temperature 200 – 2000 K at  $P = 760$  Torr with and without HIR treatments based on M06-2X/aug-cc-pVTZ level of theory. Units are in  $\text{cm}^3/\text{molecule}/\text{s}$ .

| T (K) | THFA + $\bullet\text{OH} \rightarrow$ products ( $k_{\text{tot}}$ ) |             | HIR factor |
|-------|---------------------------------------------------------------------|-------------|------------|
|       | With HIR                                                            | Without HIR |            |
| 200   | 1.52E-10                                                            | 1.58E-10    | 0.97       |
| 240   | 7.62E-11                                                            | 8.27E-11    | 0.92       |
| 298   | 3.02E-11                                                            | 3.45E-11    | 0.88       |
| 300   | 2.93E-11                                                            | 3.36E-11    | 0.87       |
| 400   | 8.03E-12                                                            | 9.83E-12    | 0.82       |
| 440   | 5.17E-12                                                            | 6.42E-12    | 0.81       |
| 500   | 2.92E-12                                                            | 3.72E-12    | 0.79       |
| 600   | 1.40E-12                                                            | 1.88E-12    | 0.74       |
| 700   | 8.80E-13                                                            | 1.27E-12    | 0.69       |
| 800   | 7.27E-13                                                            | 1.14E-12    | 0.64       |
| 900   | 7.42E-13                                                            | 1.22E-12    | 0.61       |
| 1000  | 8.69E-13                                                            | 1.46E-12    | 0.60       |
| 1100  | 1.05E-12                                                            | 1.84E-12    | 0.57       |
| 1200  | 1.32E-12                                                            | 2.30E-12    | 0.57       |
| 1300  | 1.64E-12                                                            | 2.86E-12    | 0.57       |
| 1400  | 2.01E-12                                                            | 3.53E-12    | 0.57       |
| 1500  | 2.45E-12                                                            | 4.31E-12    | 0.57       |
| 1600  | 2.96E-12                                                            | 5.19E-12    | 0.57       |
| 1700  | 3.50E-12                                                            | 6.22E-12    | 0.56       |
| 1800  | 4.15E-12                                                            | 7.36E-12    | 0.56       |
| 1900  | 4.86E-12                                                            | 8.65E-12    | 0.56       |
| 2000  | 5.62E-12                                                            | 1.01E-11    | 0.56       |

**Table S6:** Calculated NASA coefficients for the thermodynamic properties of various species in the reaction of •OH radicals with THFA.

|             |            |   |                  |                  |                  |                  |                    |
|-------------|------------|---|------------------|------------------|------------------|------------------|--------------------|
| <b>thfa</b> | C 5O 2H 10 | G | 300.000          | 2500.000         | 1500.000         | 1                |                    |
|             |            |   | 1.44199204E+003  | -2.96098649E+000 | 2.27953884E-003  | -7.73336656E-007 | 7.5468362E-011 2   |
|             |            |   | -5.59798200E+005 | -7.77553111E+003 | 2.27636269E+001  | -6.72883380E-002 | 1.41364688E-004 3  |
|             |            |   | -1.20425233E-007 | 3.53843552E-011  | -1.29649011E+004 | 1.25759690E+001  | 4                  |
| <b>p1</b>   | C 5O 2H 9  | G | 300.000          | 2500.000         | 1500.000         | 1                |                    |
|             |            |   | 9.76336354E+002  | -1.97303482E+000 | 1.49337881E-003  | -4.96199789E-007 | 6.11009829E-011 2  |
|             |            |   | -3.79575041E+005 | -5.24219352E+003 | 1.29651612E+001  | -1.05110008E-002 | 2.14023222E-005 3  |
|             |            |   | -1.71937639E-008 | 4.69909471E-012  | -6.86470688E+003 | 4.79093292E+001  | 4                  |
| <b>p2</b>   | C 5O 2H 9  | G | 300.000          | 2500.000         | 1500.000         | 1                |                    |
|             |            |   | 4.58337269E+002  | -8.79559832E-001 | 6.43619042E-004  | -2.08036706E-007 | 2.50869870E-011 2  |
|             |            |   | -1.86172719E+005 | -2.41657602E+003 | 1.69126261E+001  | -3.92445375E-002 | 8.99152215E-005 3  |
|             |            |   | -8.15139153E-008 | 2.50976841E-011  | -6.75152985E+003 | 3.16654172E+001  | 4                  |
| <b>p3</b>   | C 5O 2H 9  | G | 300.000          | 2500.000         | 1500.000         | 1                |                    |
|             |            |   | 1.05087061E+001  | -4.75154370E-002 | 7.51089246E-005  | -3.87170602E-008 | 6.53555595E-012 2  |
|             |            |   | 2.92713672E+003  | 8.30205727E+001  | 18.83906782E+000 | 1.32182348E-002  | -2.13620872E-005 3 |
|             |            |   | 1.22232083E-008  | -2.18572969E-012 | -5.80275788E+003 | 6.62516170E+001  | 4                  |
| <b>p4</b>   | C 5O 2H 9  | G | 300.000          | 2500.000         | 1500.000         | 1                |                    |
|             |            |   | 4.07768231E+002  | -8.18885324E-001 | 6.22518210E-004  | -2.06801311E-007 | 2.53603892E-011 2  |
|             |            |   | -1.57564323E+005 | -2.11580696E+003 | 1.29214888E+001  | -8.93141752E-003 | 1.53177141E-005 3  |
|             |            |   | -1.04438817E-008 | 2.26930997E-012  | -6.85362658E+003 | 4.82758815E+001  | 4                  |
| <b>p5</b>   | C 5O 2H 9  | G | 300.000          | 2500.000         | 1500.000         | 1                |                    |
|             |            |   | -3.57974502E+002 | 7.37254813E-001  | -5.41497020E-004 | 1.73395137E-007  | -2.04533531E-011 2 |
|             |            |   | 1.38496595E+005  | 2.09225203E+003  | 9.43746987E+000  | 0.04431600E-003  | -1.71189968E-005 3 |
|             |            |   | 1.33650537E-008  | -3.65793656E-012 | -6.18738122E+003 | 6.65164109E+001  | 4                  |
| <b>p6</b>   | C 5O 2H 9  | G | 300.000          | 2500.000         | 1500.000         | 1                |                    |
|             |            |   | 3.52734594E+002  | -6.66045515E-001 | 4.78394630E-004  | -1.50174932E-007 | 1.73978299E-011 2  |
|             |            |   | -1.42758161E+005 | -1.83156433E+003 | 1.32172358E+001  | -1.19744701E-002 | 2.28259825E-005 3  |
|             |            |   | -1.86970333E-008 | 5.60636335E-012  | -5.18509133E+003 | 4.98886498E+001  | 4                  |
| <b>h</b>    | H 1        | G | 300.000          | 2500.000         | 1500.000         | 1                |                    |
|             |            |   | 5.81798613E-001  | 3.04299756E-005  | -2.24587211E-008 | 7.29794003E-012  | -8.81051484E-016 2 |
|             |            |   | 6.09430563E+003  | -7.42447376E-003 | 5.96967320E-001  | 8.73608570E-007  | -1.71249373E-009 3 |
|             |            |   | 1.35696245E-012  | -3.78262084E-016 | 6.08821338E+003  | -9.13185345E-002 | 4                  |
| <b>oh</b>   | O 1H 1     | G | 300.000          | 2500.000         | 1500.000         | 1                |                    |
|             |            |   | 5.86957276E+000  | -9.89688533E-003 | 7.57446895E-006  | -2.54435233E-009 | 3.16463704E-013 2  |
|             |            |   | -1.02419927E+003 | -2.47784756E+001 | 1.10615246E+000  | -2.24996554E-004 | 5.51410556E-007 3  |
|             |            |   | -5.35349385E-010 | 1.76874109E-013  | 8.13989365E+002  | 1.36953152E+000  | 4                  |
| <b>h2o</b>  | O 1H 2     | G | 300.000          | 2500.000         | 1500.000         | 1                |                    |
|             |            |   | -3.38999858E+001 | 7.22984856E-002  | -5.45933831E-005 | 1.81609996E-008  | -2.24679443E-012 2 |
|             |            |   | 6.59630499E+003  | 1.99083965E+002  | 1.63301321E+000  | 2.91315042E-004  | -7.69280969E-007 3 |
|             |            |   | 8.12651090E-010  | -2.87529901E-013 | -7.26567317E+003 | 3.71963447E+000  | 4                  |

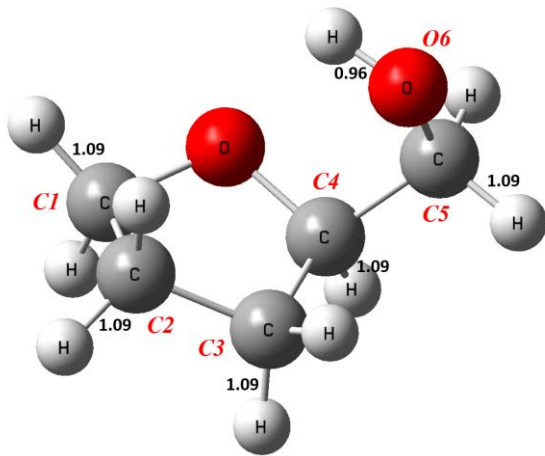

**THFA**

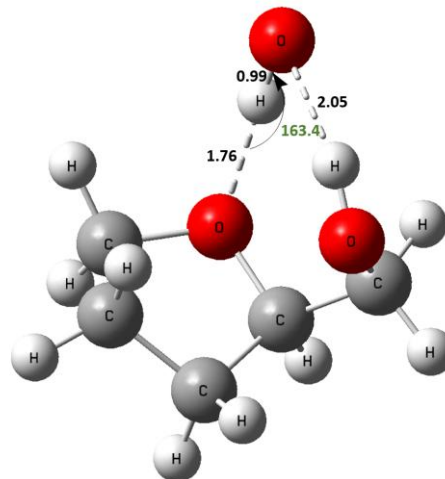

**reactant-complex (RC)**

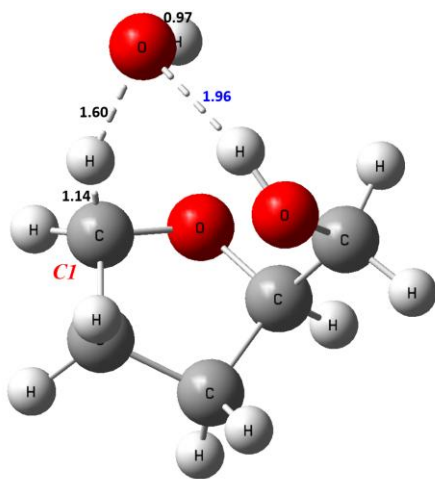

**TS1a**

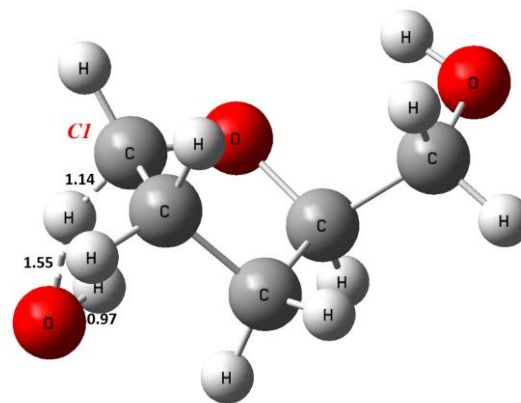

**TS1b**

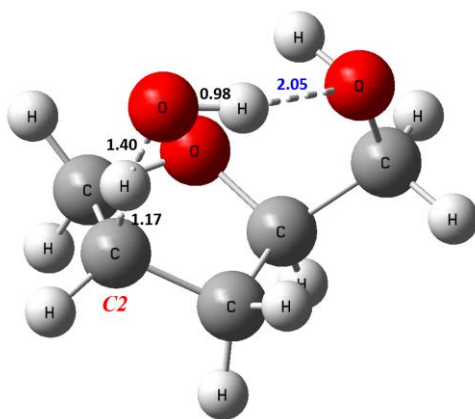

**TS2a**

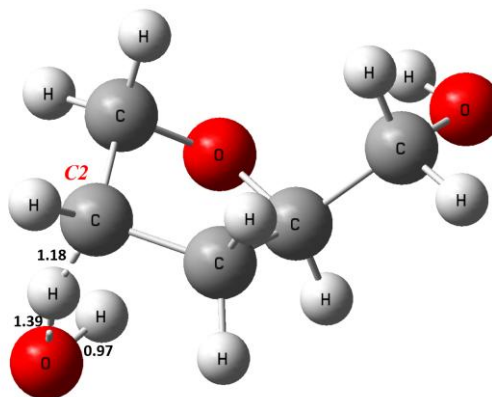

**TS2b**

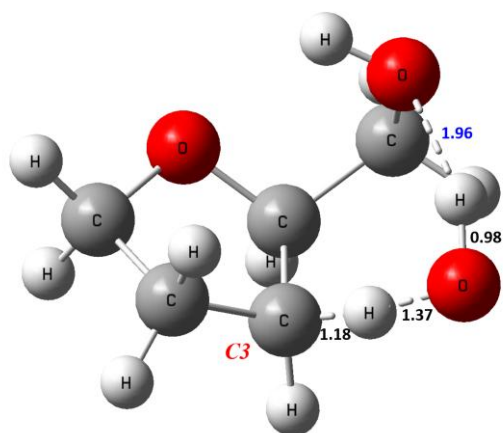

TS3a

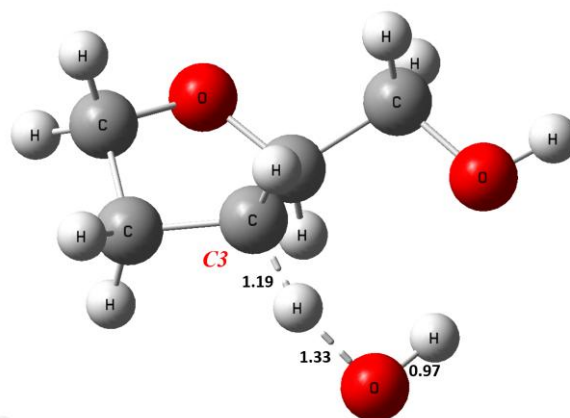

TS3b

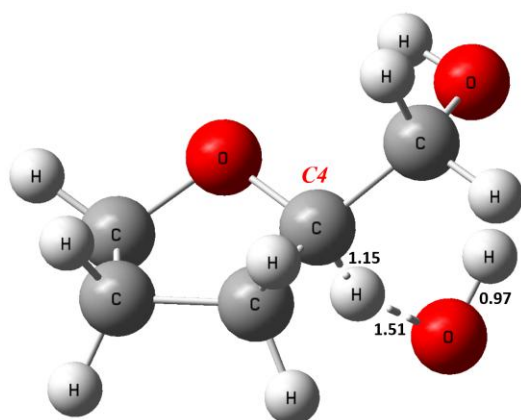

TS4

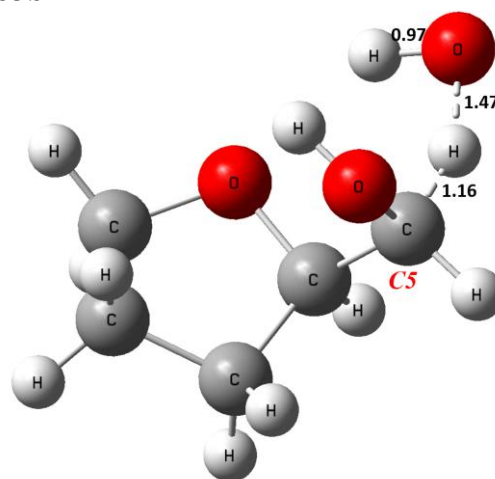

TS5

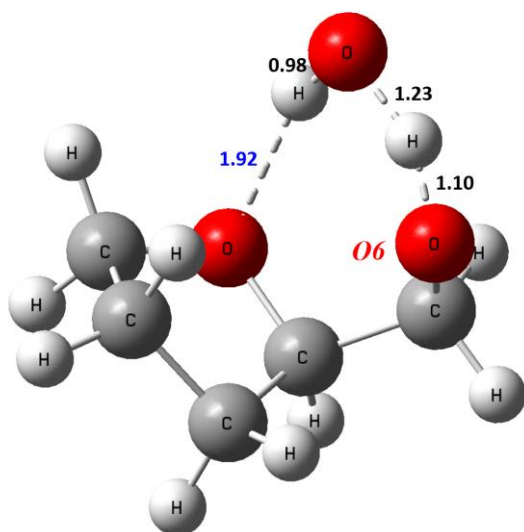

TS6

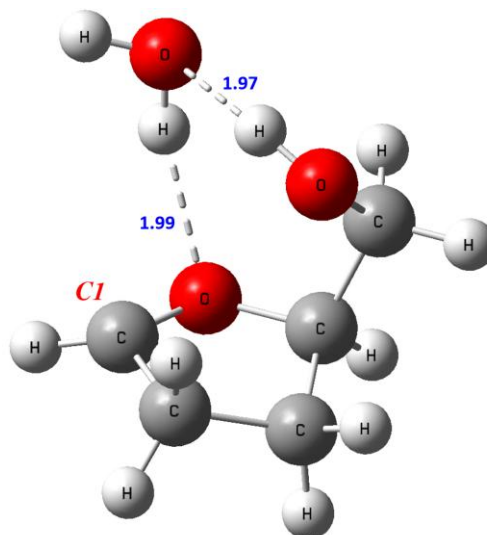

PC1a

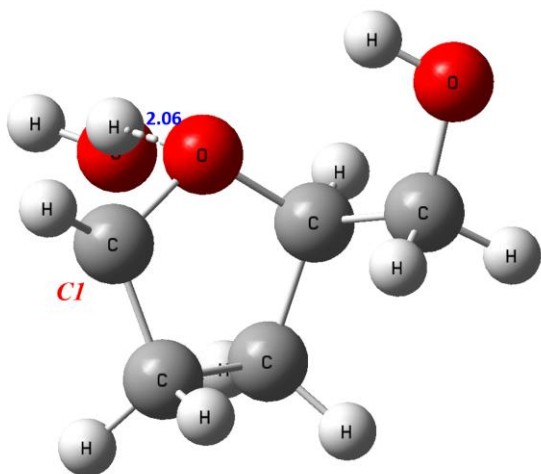

PC1b

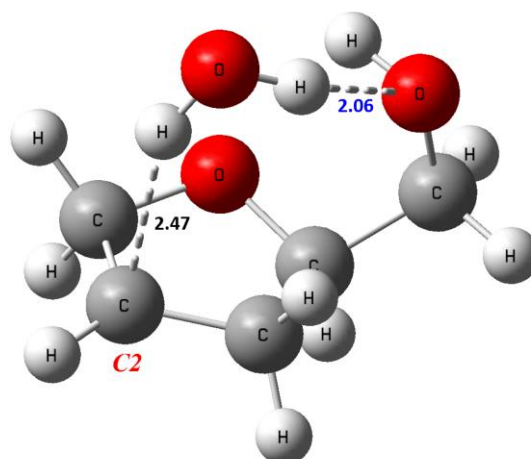

PC2a

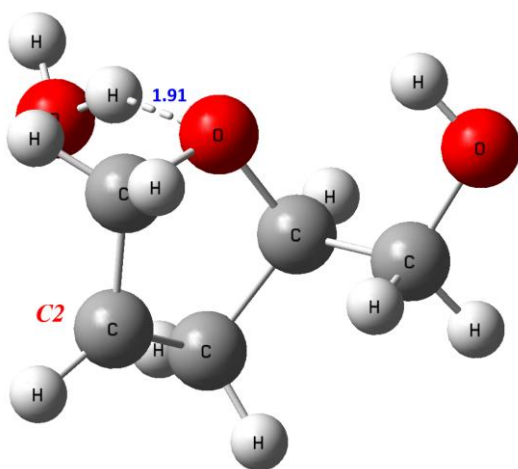

PC2b

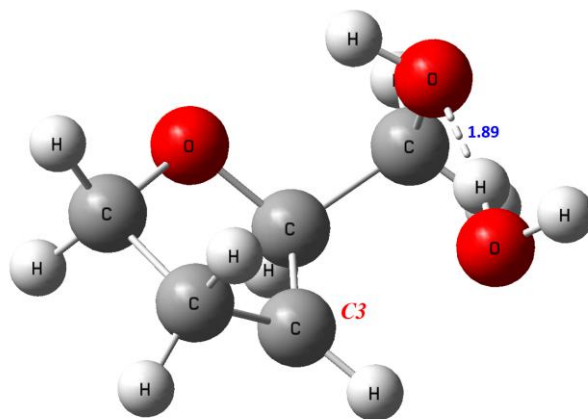

PC3a

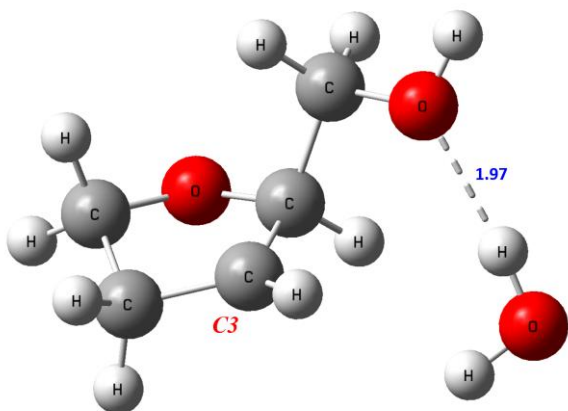

PC3b

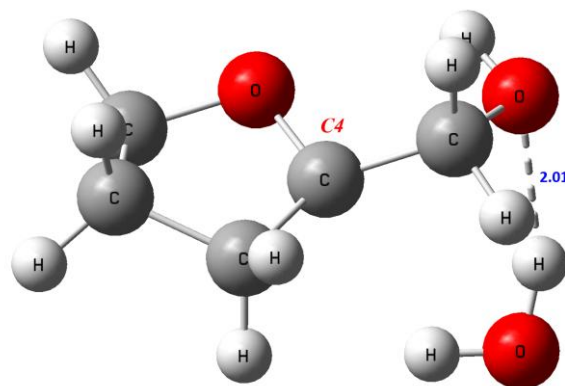

PC4

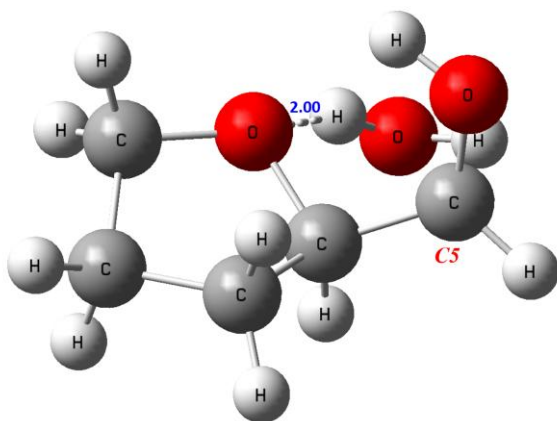

**PC5**

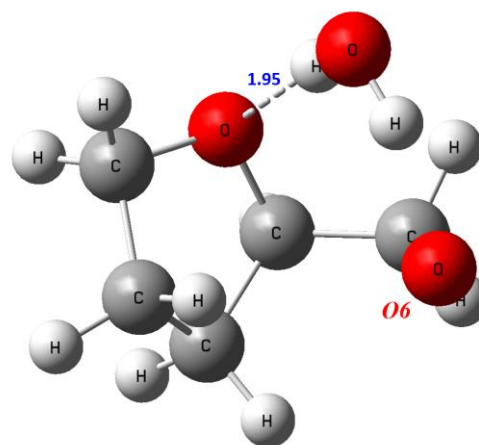

**PC6**

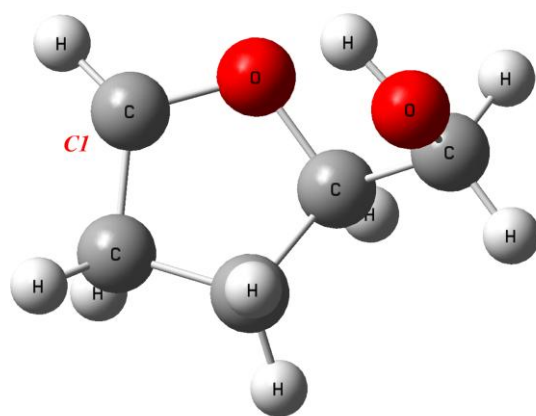

**P1**

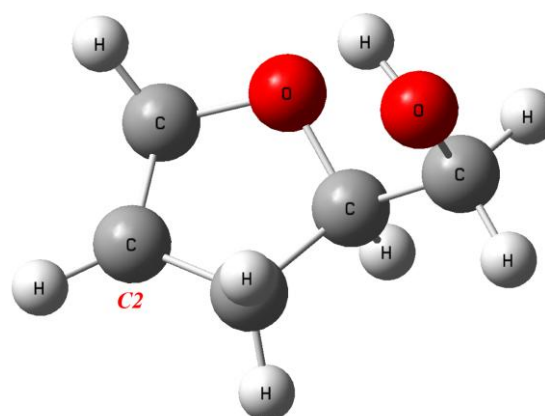

**P2**

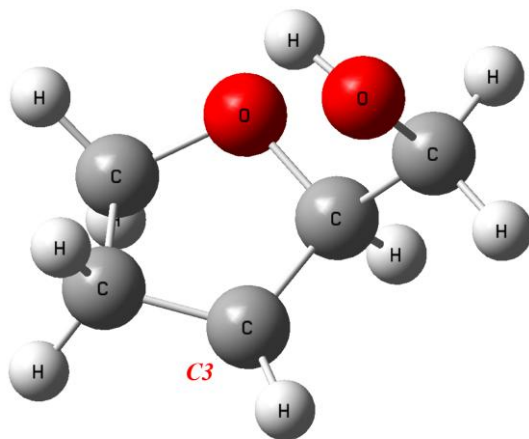

**P3**

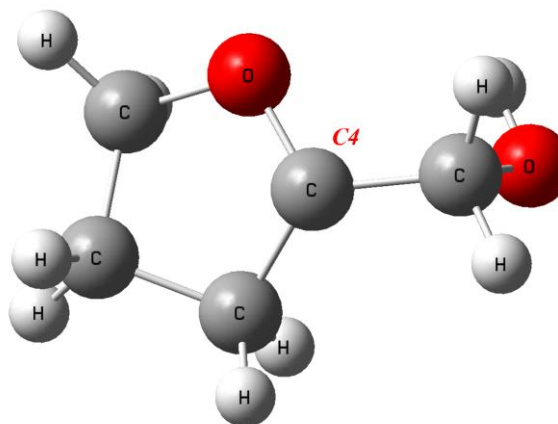

**P4**

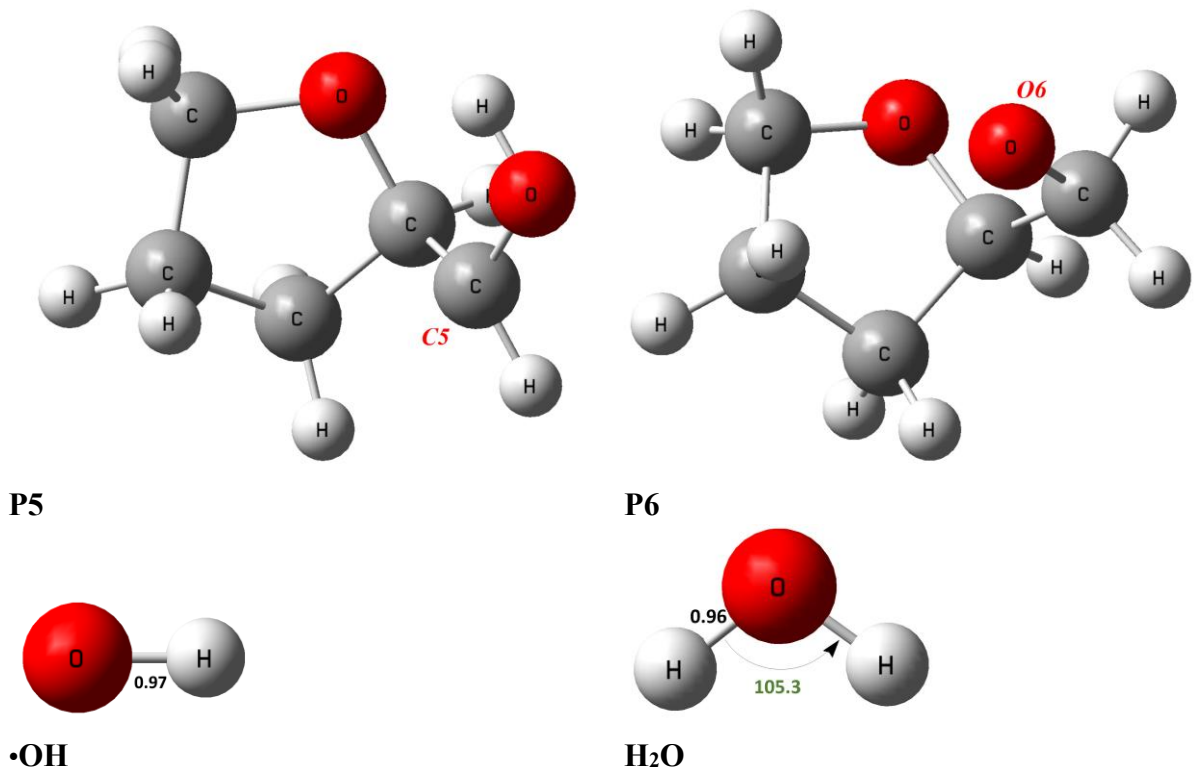

**Figure S1:** M06-2X/aug-cc-pVTZ optimized geometries for the species involved in the title reaction. All structures were obtained for the lowest-energy conformer of a given species. Bond lengths and bond angles are in Å and degree (°), respectively.

## Species

## Potential energy surfaces for the internal rotations

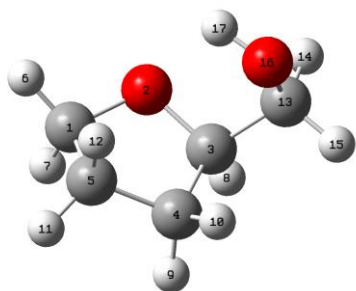

THFA

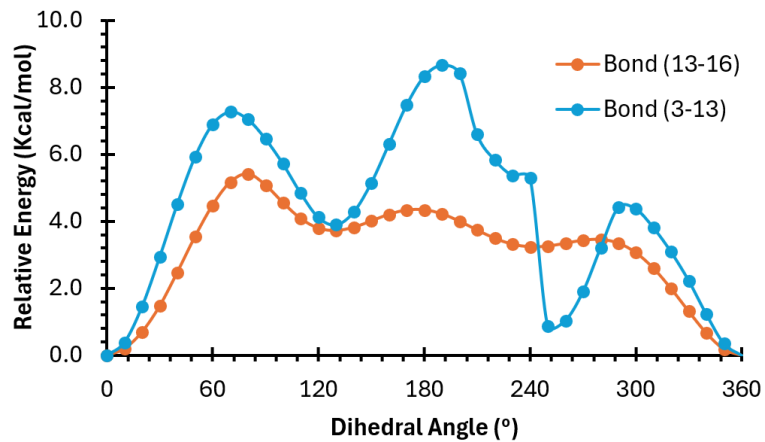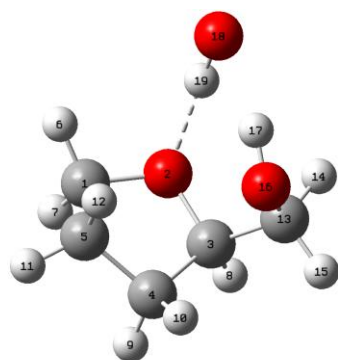

RC

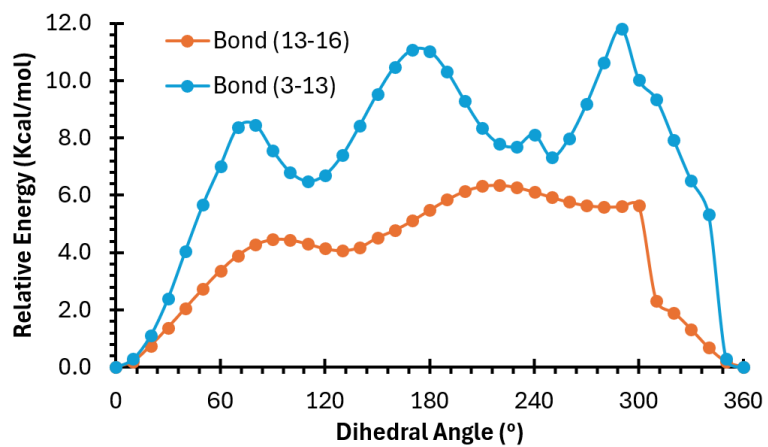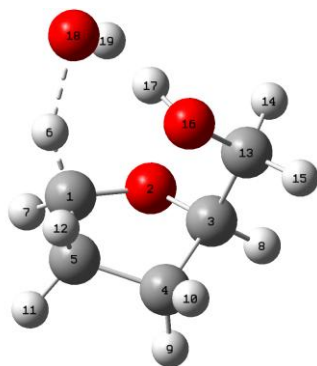

TS1a

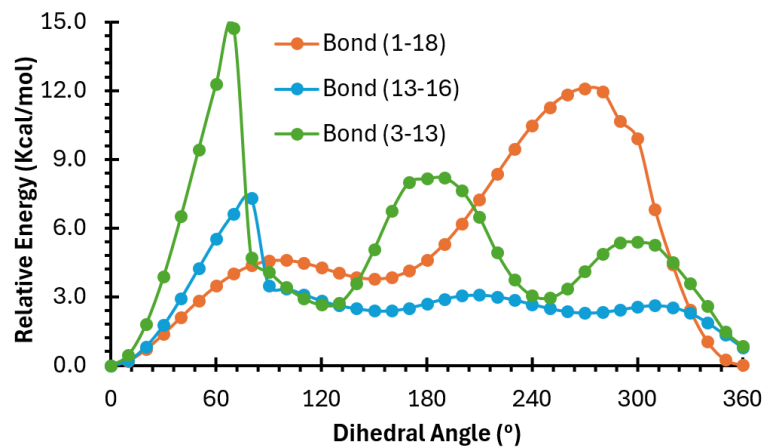

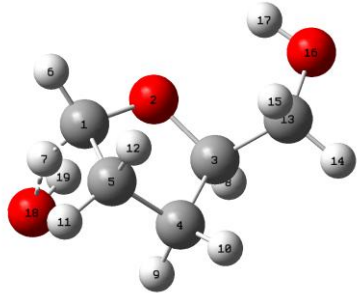

TS1b

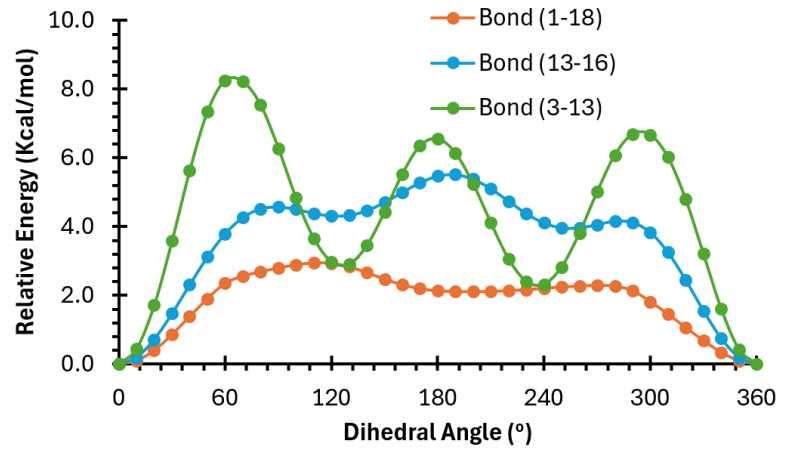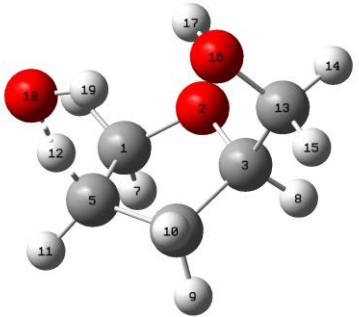

TS2a

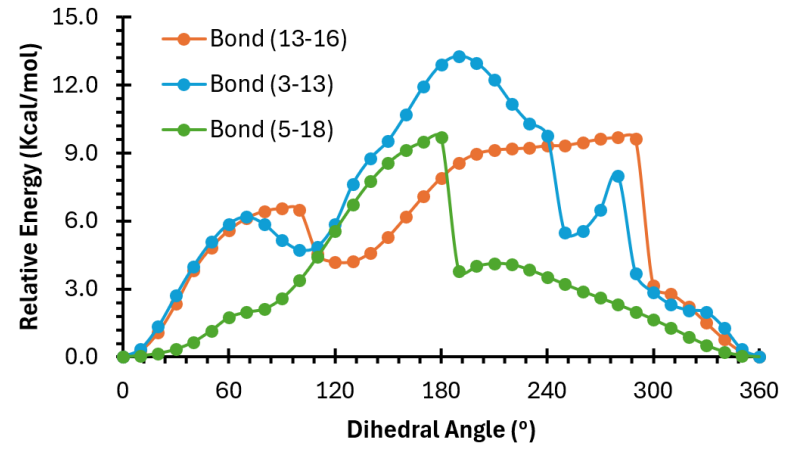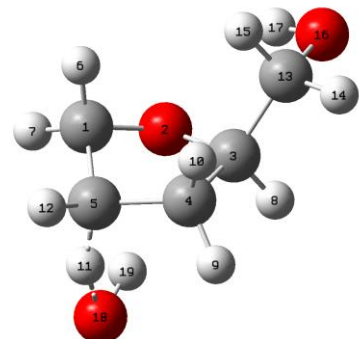

TS2b

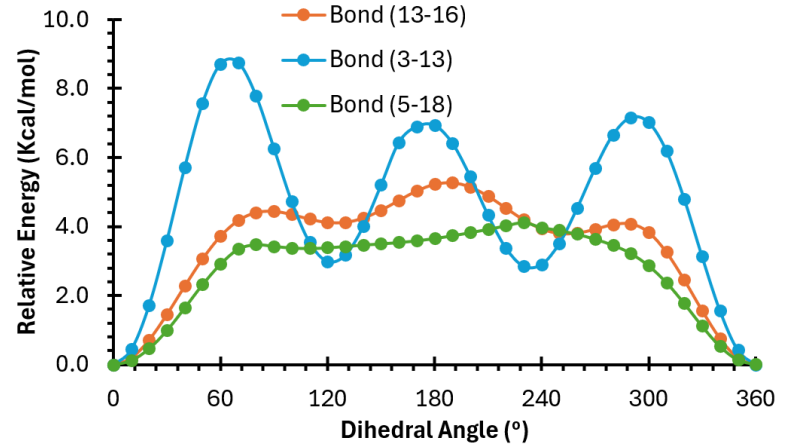

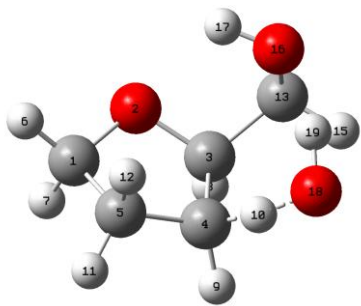

TS3a

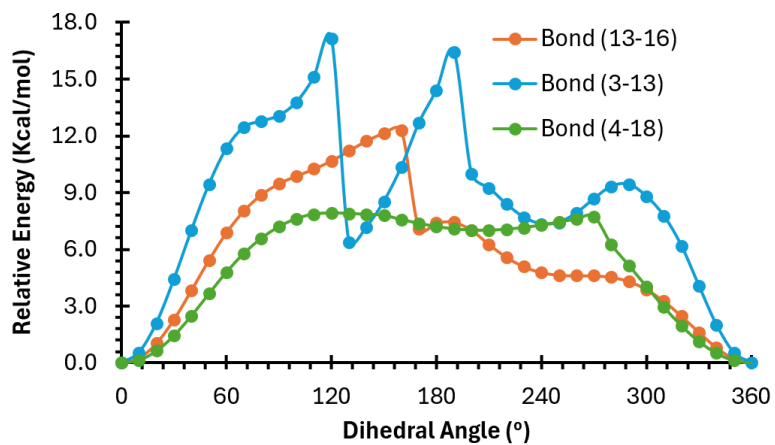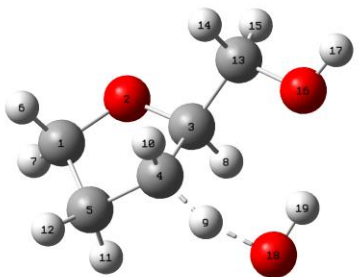

TS3b

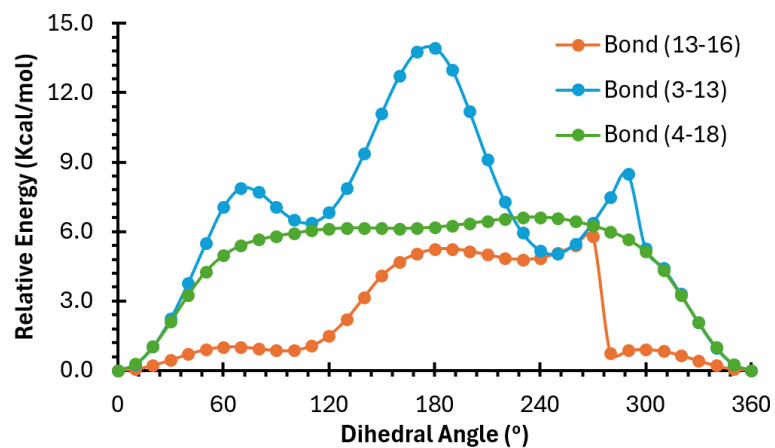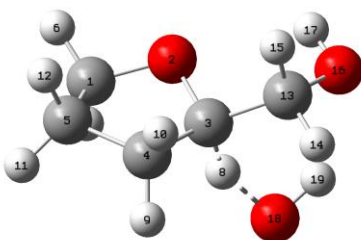

TS4

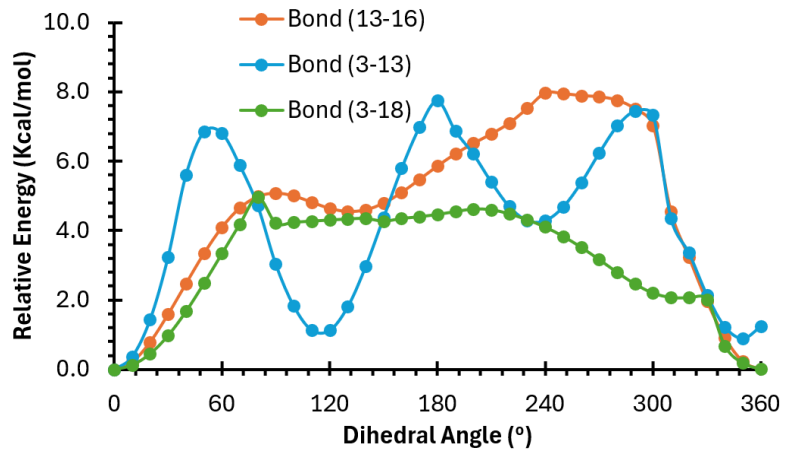

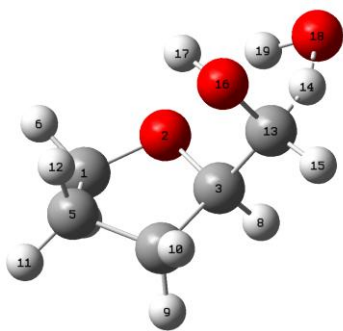

TS5

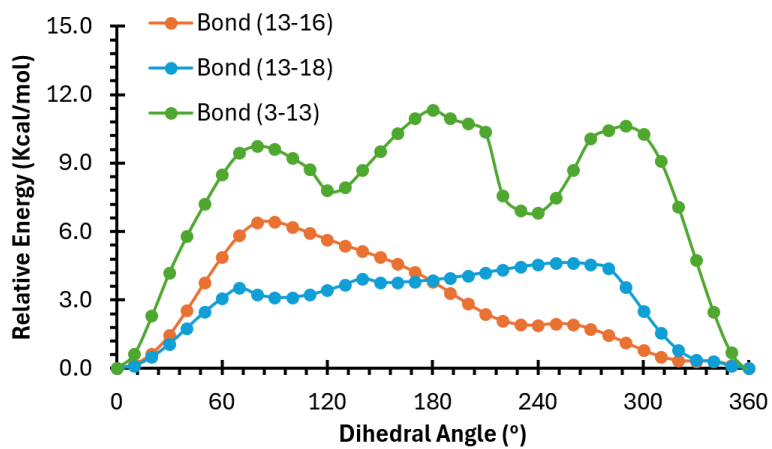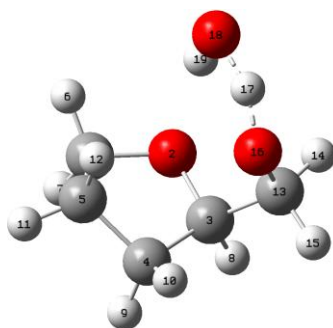

TS6

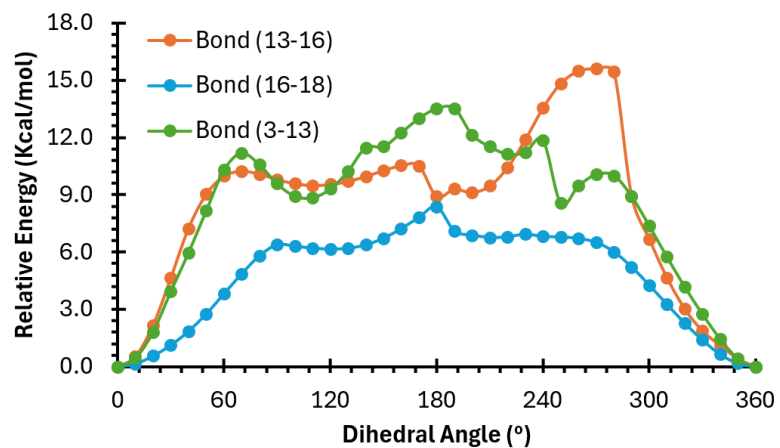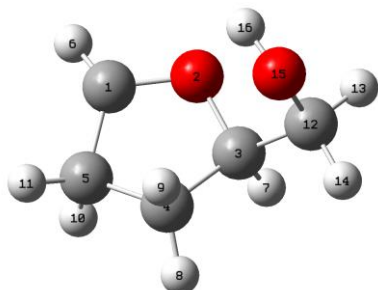

P1

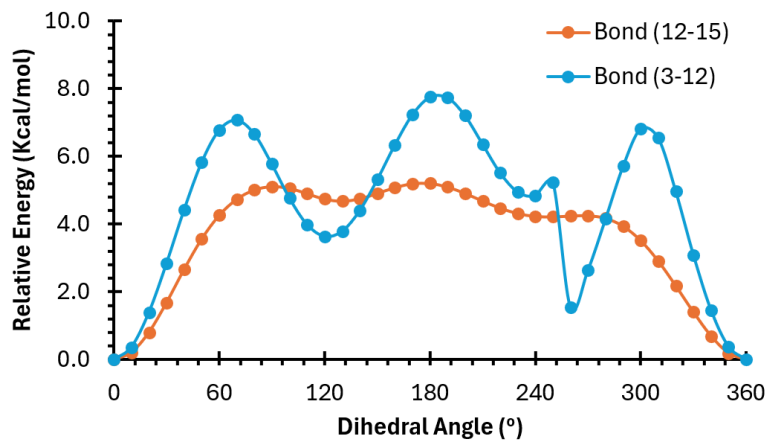

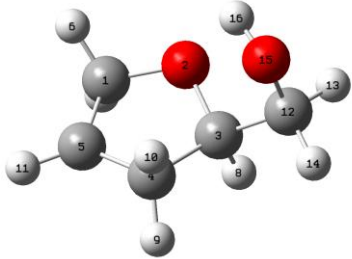

P2

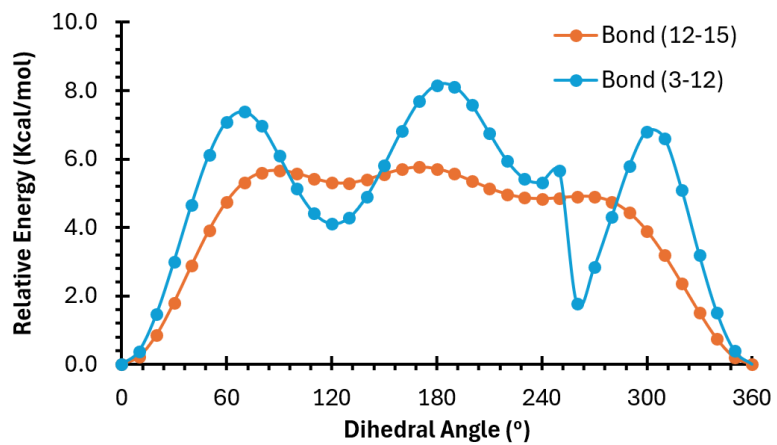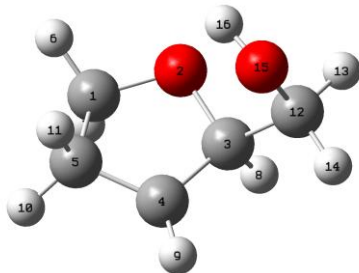

P3

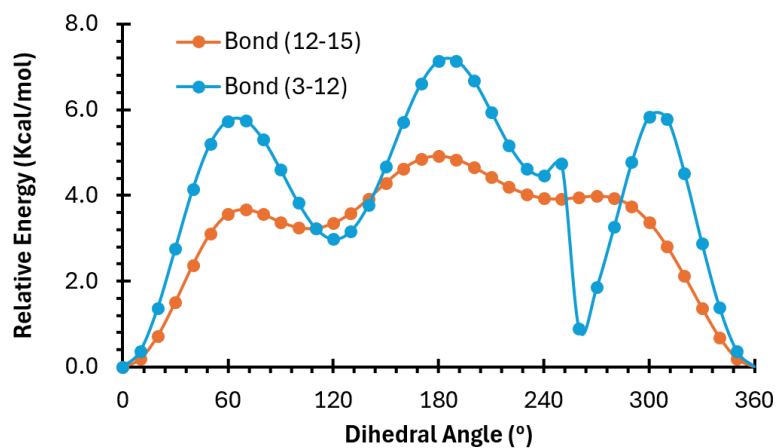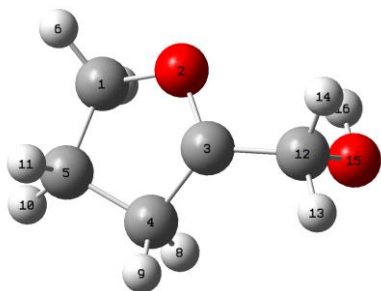

P4

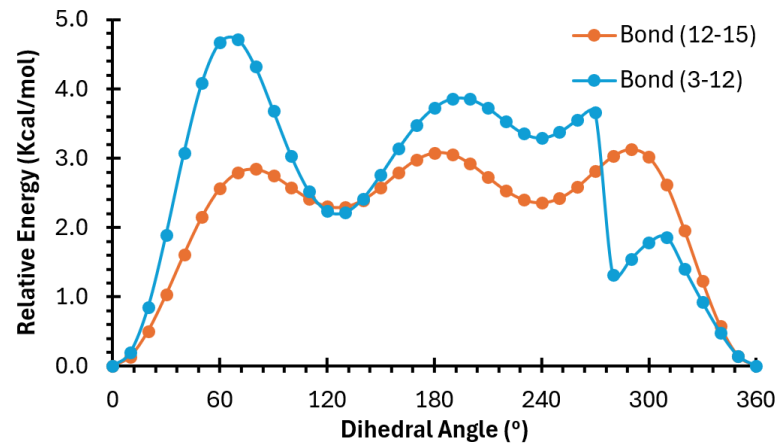

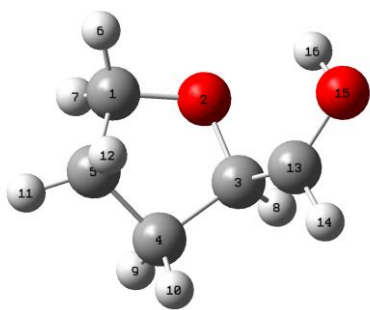

P5

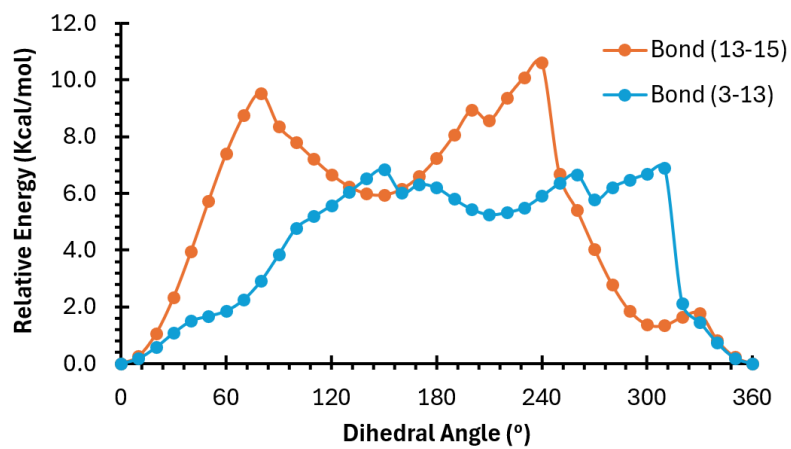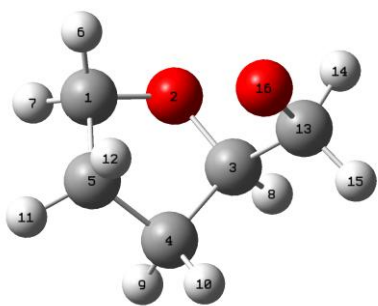

P6

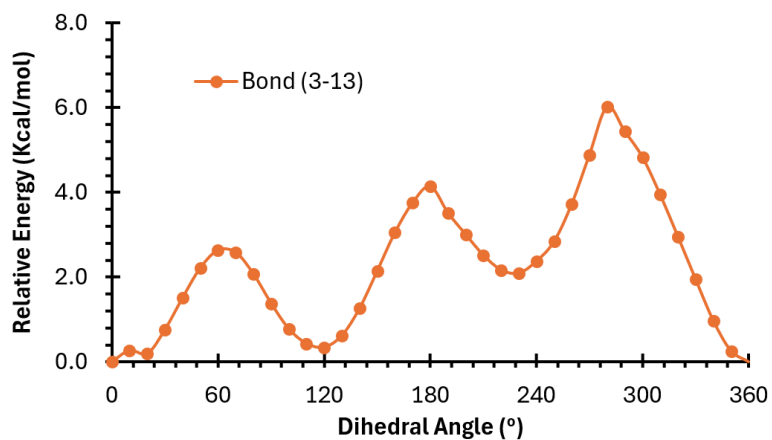

**Figure S2:** Hindrance potentials for the species involved in the THFA +  $\bullet$ OH reaction, calculated at M06-2X/cc-pVDZ level of theory.

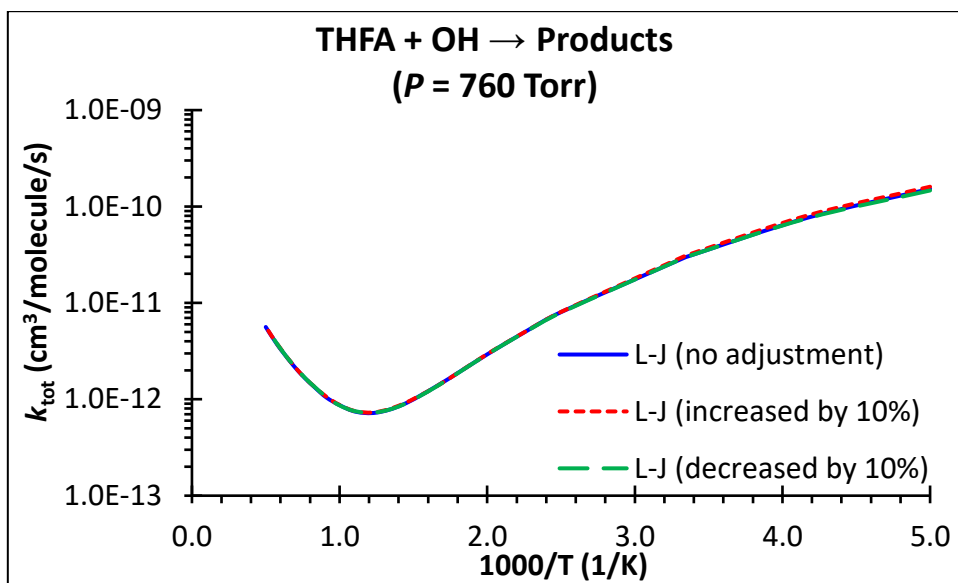

**Figure S3:** Calculated total rate constants for the reaction between THFA and  $\bullet\text{OH}$  radicals with and without adjustment of the Lennard-Jones (L-J) parameters at 760 Torr.

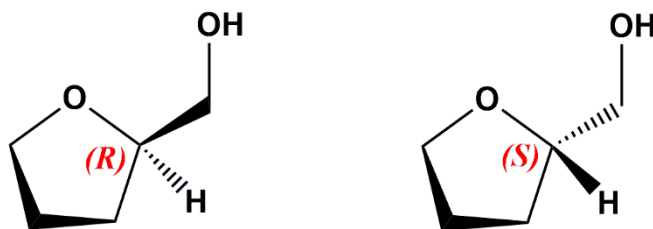

**Figure S4:** Structures of the two enantiomers of THFA: the (*R*) conformer (a) and the (*S*) conformer (b).

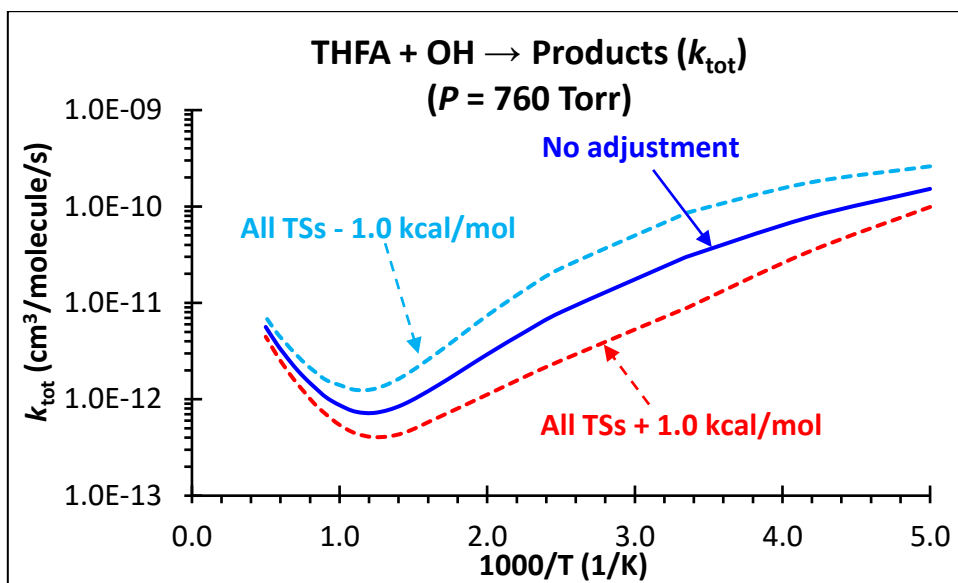

**Figure S5:** Predicted total rate constant ( $k_{\text{tot}}$ ) for the reaction of THFA with  $\bullet\text{OH}$  radicals at 760 Torr, calculated without barrier adjustment and with all barrier heights varied by  $\pm 1.0$  kcal/mol.
